# Supplementary material for: Risk and adverse outcomes of fractures in patients with liver cirrhosis: two nationwide retrospective cohort studies
Source: PubMed Central journal article supplement (PMC5640047; doi:10.1136/bmjopen-2017-017342), 2017-10-08
Supplement: bmjopen-2017-017342.draft_revisions.pdf [file bmjopen-2017-017342.draft_revisions.pdf]

# BMJ Open

BMJ Open is committed to open peer review. As part of this commitment we make the peer review history of every article we publish publicly available.

When an article is published we post the peer reviewers' comments and the authors' responses online. We also post the versions of the paper that were used during peer review. These are the versions that the peer review comments apply to.

The versions of the paper that follow are the versions that were submitted during the peer review process. They are not the versions of record or the final published versions. They should not be cited or distributed as the published version of this manuscript.

BMJ Open is an open access journal and the full, final, typeset and author-corrected version of record of the manuscript is available on our site with no access controls, subscription charges or pay-per-view fees (<http://bmjopen.bmj.com>).

If you have any questions on BMJ Open's open peer review process please email [editorial.bmjopen@bmj.com](mailto:editorial.bmjopen@bmj.com)

# BMJ Open

## Risk and adverse outcomes of fractures in patients with liver cirrhosis: two nationwide retrospective cohort studies

|                                 |                                                                                                                                                                                                                                                                                                                                                                                                                                                                                                                                                                                                                                                                                    |
|---------------------------------|------------------------------------------------------------------------------------------------------------------------------------------------------------------------------------------------------------------------------------------------------------------------------------------------------------------------------------------------------------------------------------------------------------------------------------------------------------------------------------------------------------------------------------------------------------------------------------------------------------------------------------------------------------------------------------|
| Journal:                        | <i>BMJ Open</i>                                                                                                                                                                                                                                                                                                                                                                                                                                                                                                                                                                                                                                                                    |
| Manuscript ID                   | bmjopen-2017-017342                                                                                                                                                                                                                                                                                                                                                                                                                                                                                                                                                                                                                                                                |
| Article Type:                   | Research                                                                                                                                                                                                                                                                                                                                                                                                                                                                                                                                                                                                                                                                           |
| Date Submitted by the Author:   | 20-Apr-2017                                                                                                                                                                                                                                                                                                                                                                                                                                                                                                                                                                                                                                                                        |
| Complete List of Authors:       | Chen, Ta-Liang; Taipei Medical University Hospital, Department of Anesthesiology<br>Lin, Chao-Shun; Taipei Medical University Hospital, Department of Anesthesiology<br>Shih, Chun-Chuan; I-Shou University, School of Chinese Medicine for Post-Baccalaureate<br>Huang, Yu-Feng; Mackay Memorial Hospital Taitung Branch Hospital, Department of Anesthesiology<br>Yeh, Chun-Chieh; University of Illinois, Department of Surgery<br>Wu, Chih-Hsing; National Cheng Kung University Hospital, Family Medicine<br>Liao, Chien-Chang; Taipei Medical University Hospital, Department of Anesthesiology; Taipei Medical University, Department of Anesthesiology, School of Medicine |
| <b>Primary Subject Heading</b>: | Epidemiology                                                                                                                                                                                                                                                                                                                                                                                                                                                                                                                                                                                                                                                                       |
| Secondary Subject Heading:      | Gastroenterology and hepatology, Rehabilitation medicine                                                                                                                                                                                                                                                                                                                                                                                                                                                                                                                                                                                                                           |
| Keywords:                       | liver cirrhosis, fracture, risk, outcome                                                                                                                                                                                                                                                                                                                                                                                                                                                                                                                                                                                                                                           |
|                                 |                                                                                                                                                                                                                                                                                                                                                                                                                                                                                                                                                                                                                                                                                    |

SCHOLARONE™  
Manuscripts

1  
2  
3  
4 **Risk and adverse outcomes of fractures in patients with liver cirrhosis: two nationwide**  
5  
6  
7 **retrospective cohort studies**  
8

9 Ta-Liang Chen,<sup>1,2,3</sup> Chao-Shun Lin,<sup>1,2,3</sup> Chun-Chuan Shih,<sup>4</sup> Yu-Feng Huang,<sup>5</sup> Chun-Chieh

10  
11  
12 Yeh,<sup>6,7</sup> Chih-Hsing Wu,<sup>8</sup> Chien-Chang Liao<sup>1,2,3,9,10</sup>  
13

14  
15 <sup>1</sup>Department of Anesthesiology, Taipei Medical University Hospital, Taipei, Taiwan  
16

17  
18 <sup>2</sup>Anesthesiology and Health Policy Research Center, Taipei Medical University Hospital,  
19

20  
21 Taipei, Taiwan  
22

23  
24 <sup>3</sup>Department of Anesthesiology, School of Medicine, College of Medicine, Taipei Medical  
25

26  
27 University, Taipei, Taiwan  
28

29  
30 <sup>4</sup>The School of Chinese Medicine for Post-Baccalaureate, I-Shou University, Kaohsiung,  
31

32  
33 Taiwan  
34

35  
36 <sup>5</sup>Department of Anesthesiology, Taitung Mackay Memorial Hospital, Taitung, Taiwan  
37

38  
39 <sup>6</sup>Department of Surgery, China Medical University Hospital, Taichung, Taiwan  
40

41  
42 <sup>7</sup>Department of Surgery, University of Illinois, Chicago, United States of America  
43

44  
45 <sup>8</sup>Department of Family Medicine, National Cheng Kung University Hospital, Tainan, Taiwan  
46

47  
48 <sup>9</sup>School of Chinese Medicine, College of Chinese Medicine, China Medical University,  
49

50  
51 Taichung, Taiwan  
52

53  
54 <sup>10</sup>Department of Anesthesiology, Shuan Ho Hospital, Taipei Medical University, New Taipei  
55

56  
57 City, Taiwan  
58  
59  
60

1  
2  
3  
4 Correspondence:

5  
6 Chien-Chang Liao, PhD, MPH

7  
8 Associate Professor

9  
10 Department of Anesthesiology, Taipei Medical University Hospital

11  
12 252 Wuxing St., Taipei 11031, Taiwan

13  
14  
15 Tel: 886-2-2737-2181, ext. 8310

16  
17  
18 Fax: 886-2-2736-7344

19  
20  
21 E-mail: jacky48863027@yahoo.com.tw; ccliao@tmu.edu.tw

22  
23  
24 Abstract: 230 words; Text: 2243 words; References: 39

25  
26  
27 **Running head:** Liver cirrhosis and fracture

28  
29  
30 **Abbreviations:** CI=confidence interval; HR=hazard ratio; ICD-9-CM=International

31  
32  
33 Classification of Diseases, Ninth Revision, Clinical Modification; LC=liver cirrhosis;

34  
35  
36 OR=odds ratio

37  
38  
39 **Key Words:** liver cirrhosis; fracture; risk; outcomes

**Abstract**

**Objective:** The aim of this study is to evaluate fracture risk and post-fracture outcomes in patients with liver cirrhosis (LC).

**Design:** Retrospective cohort study and nested cohort study.

**Setting:** This study was based on Taiwan's National Health Insurance Research Database that included information on: (1) 3941 patients with aged 20 years and older newly diagnosed with LC between 2000 and 2003; (2) 688,560 hospitalized fracture patients aged 20 years and older between 2006 and 2013.

**Primary and secondary outcome measures:** Followed-up events of fracture from 2000 until 2008 were noted from medical claims to evaluate adjusted hazard ratios (HRs) and 95% confidence intervals (CIs) of fracture associated with LC. Adjusted odds ratios (ORs) and 95% CIs of adverse events after fracture were compared among patients with and without LC

**Results:** The incidences of fracture for people with and without LC were 28.0 and 16.9 per 1000 person-years, respectively. Compared with control, the adjusted HR of fracture was 1.71 (95% CI 1.55-1.87) for LC patients. Previous LC was associated with risks of septicemia (OR 1.87, 95% CI 1.68-2.0), acute renal failure (OR 1.77, 95% CI 1.43-2.18), and mortality (OR 1.71, 95% CI 1.45-2.01) after fracture.

**Conclusion:** LC was associated with higher risk of fracture; LC patients in particular had more complications and mortality after fracture. Fracture prevention and attention to

1  
2  
3  
4 post-fracture adverse events are needed for these susceptible populations.  
5  
6  
7  
8  
9  
10  
11  
12  
13  
14  
15  
16  
17  
18  
19  
20  
21  
22  
23  
24  
25  
26  
27  
28  
29  
30  
31  
32  
33  
34  
35  
36  
37  
38  
39  
40  
41  
42  
43  
44  
45  
46  
47  
48  
49  
50  
51  
52  
53  
54  
55  
56  
57  
58  
59  
60

For peer review only

1  
2  
3  
4 Strengths of this study  
5

6  
7 (1) Our study is an longitudinal retrospective cohort with large sample size.  
8

9  
10 (2) We used frequency matching and multivariate Cox proportional hazard models to control  
11  
12 the confounding bias.  
13

14  
15 (3) This is the first study with comprehensive assessment of the impact of liver cirrhosis on  
16  
17 the fracture risk and outcomes.  
18  
19

20  
21 Limitations of this study  
22

23  
24 (1) Our data lack of clinical risk scores, lesion characteristics, biochemical measures, and  
25  
26 lifestyles of fracture patients and cirrhosis patients.  
27

28  
29 (2) The detailed lifestyle included smoking, alcohol drinking, and physical activity were not  
30  
31 available.  
32  
33  
34  
35  
36  
37  
38  
39  
40  
41  
42  
43  
44  
45  
46  
47  
48  
49  
50  
51  
52  
53  
54  
55  
56  
57  
58  
59  
60

## INTRODUCTION

Liver cirrhosis (LC) is the fourth-most-common cause of death in Europe, and causes more than one million deaths every year worldwide.[1,2] Prevalence of LC increased 68% during the 1992-2001 decade in the UK; in the US, it remains a pandemic chronic disease with more than 600,000 patients in 1999-2010 whose economic burden was shown to have doubled during 1998 and 2003.[3-5] Although the epidemiology, pathogenesis, prevention, and treatment of LC have been studied,[6] complications of liver cirrhosis are not well understood.

Fracture causes disability and mortality, and places economic burdens on societies.[7,8] Since many studies found patients with LC had increased risk of osteoporosis,[9-11] fall and fracture were considered complications for patients with LC.[12-20] However, these studies did not compare the risk of fracture or falls between people with and without LC. Small sample size,[12,14-18] inadequate adjustment for confounding factors,[12-18] case-control study design,[12,14,16-19] focus on specific population,[12] lack of control group,[14,16,18,19] and of subgroup analysis [14-17,19,20] limited previous investigations. Information also was lacking on whether LC is associated with post-fracture adverse outcomes.

With the use of reimbursement claims from Taiwan's National Health Insurance program, we conducted two nationwide cohort studies. The retrospective cohort study seeks to validate



1  
2  
3  
4  
5  
6  
7  
8  
9  
10  
11  
12  
13  
14  
15  
16  
17  
18  
19  
20  
21  
22  
23  
24  
25  
26  
27  
28  
29  
30  
31  
32  
33  
34  
35  
36  
37  
38  
39  
40  
41  
42  
43  
44  
45  
46  
47  
48  
49  
50  
51  
52  
53  
54  
55  
56  
57  
58  
59  
60

the risk of fracture in patients with LC. Whether LC was associated with adverse outcomes after fracture was reported in the nested cohort study.

For peer review only

## METHODS

### Source of data

This study used the claims data of Taiwan's National Health Insurance Program, which was implemented in March 1995 and covers 99% of 23 million people nationwide. The National Health Research Institutes (NHRI) established the National Health Insurance Research Database to record all beneficiaries' information about inpatient and outpatient medical services. This includes basic patient demographics, physician's primary and secondary diagnoses, treatment procedures, prescribed medications, and medical expenditures. All contracted medical clinics, hospitals and medical centers are required to submit computerized claim documents for medical expenses. The validity of this database has been favorably evaluated, and research articles based on it have been accepted in scientific journals worldwide.[21-23]

### Ethical approval

Insurance reimbursement claims used in this study were decoded with patient identifications scrambled for further research access. This study was conducted in accordance with the Helsinki Declaration. Although NHRI regulations do not require informed consent because patient identification has been decoded for privacy, this study also was approved by Taiwan's National Health Research Institutes (NHIRD-103-121) and Taipei Medical University's Joint Institutional Review Board (TMU-JIRB-201404070).

## Study design

From the representative sample of 1,000,000 insurance enrollees, we required at least two visits for medical care with the physician's primary diagnosis of cirrhosis of the liver to identify a cohort of 3941 newly diagnosed adults aged  $\geq 20$  years in 2000-2003. The frequency-matching procedure (by age and sex) was used to select the cohort, who had no previous medical records of LC. Both LC and non-LC cohorts had no history of fracture between the index date (date of second LC diagnosis) and January 1, 1996 (the starting date of the Taiwan's National Health Insurance Program). The outcome of this retrospective cohort study is incident event of fracture that was identified during the follow-up period from the index date until the end of 2008 for LC and non-LC cohorts. The purpose of this study is to compare the risk of fracture between people with and without LC.

In the fracture nested cohort study including 688,560 hospitalized fracture patients in 2004-2013, we identified 7854 with history of LC within pre-fracture 24 months. Thirty-day mortality, septicemia, and acute renal failure after fracture were considered as post-fracture outcomes and compared between fracture patients with and without LC.

## Measurements and definitions

Low-income status was determined by the National Health Insurance Bureau, which validates those qualified for waived health-care co-payment. Following previous suggestions,[21,22] fracture-associated medications were also analyzed; these included

1  
2  
3  
4 anxiolytics, antiepileptics, antipsychotics, antidepressants, and oral steroids. We used the  
5  
6 *International Classification of Diseases, Ninth Revision, Clinical Modification* (ICD-9-CM)  
7  
8  
9  
10 and administration codes of Taiwan's National Health Insurance to examine the physician's  
11  
12 diagnoses and medical services. We identified patient medical conditions and complications  
13  
14 such as mental disorders (ICD-9-CM 290-319), hypertension (ICD-9-CM 410-405), chronic  
15  
16 obstructive pulmonary disease (ICD-9-CM 490-496), diabetes (ICD-9-CM 250), ischemic  
17  
18 heart disease (ICD-9-CM 410-414), stroke (ICD-9-CM 430-438), hyperlipidemia (ICD-9-CM  
19  
20 272.0, 272.1, and 272.2), heart failure (ICD-9-CM 428), renal dialysis (D8, D9), Parkinson's  
21  
22 disease (ICD-9-CM 332), liver cirrhosis (571.2, 571.5, and 571.6), fracture (ICD-9-CM  
23  
24 800-829), sepsis (ICD-9-CM 038 and 998.5), and acute renal failure (ICD-9-CM 548).  
25  
26  
27  
28  
29  
30  
31  
32  
33 Thirty-day in-hospital mortality is the main outcome in the nested fracture cohort study.  
34

### 35 36 **Statistical analysis**

37  
38 In the retrospective cohort study, the categorical data for cohorts with and without LC were  
39  
40 analyzed by chi-square tests. The adjusted hazard ratios (HRs) and confidence intervals (CIs)  
41  
42 of fracture risk associated with liver cirrhosis were calculated in the multiple Cox  
43  
44 proportional hazard models, as were associations between LC and fracture risk in males,  
45  
46  
47 females, and every age group. We used chi-square tests to examine other sociodemographic  
48  
49  
50 factors and medical conditions in the nested fracture study. The multiple logistic regressions  
51  
52  
53 were used to calculate adjusted odds ratios (ORs) and 95% CIs of post-fracture mortality,  
54  
55  
56  
57  
58  
59  
60

1  
2  
3  
4  
5  
6  
7  
8  
9  
10  
11  
12  
13  
14  
15  
16  
17  
18  
19  
20  
21  
22  
23  
24  
25  
26  
27  
28  
29  
30  
31  
32  
33  
34  
35  
36  
37  
38  
39  
40  
41  
42  
43  
44  
45  
46  
47  
48  
49  
50  
51  
52  
53  
54  
55  
56  
57  
58  
59  
60

sepsis, and acute renal failure associated with history of LC.

For peer review only

## RESULTS

Because we used frequency-matching procedure (Table 1), there was no significant difference in age and sex between cohorts with and without LC. The LC cohort had more medical conditions than the non-LC cohort; these included mental disorders ( $p<0.0001$ ), hypertension ( $p=0.0046$ ), chronic obstructive pulmonary disease ( $p<0.0001$ ), diabetes ( $p<0.0001$ ), ischemic heart disease ( $p<0.0001$ ), stroke ( $p<0.0001$ ), hyperlipidemia ( $p=0.0003$ ), heart failure ( $p<0.0001$ ), renal dialysis ( $p<0.0001$ ), and Parkinson's disease ( $p<0.0001$ ). The use of anxiolytics ( $p<0.0001$ ), antiepileptics ( $p<0.0001$ ), antipsychotics ( $p<0.0001$ ), and antidepressants ( $p<0.0001$ ) was also higher in patients with LC than in people without LC.

During the 5-8 years of follow-up (Table 2), the incidences of fracture for cohorts with and without LC were 29.1 and 17.2 per 1000 person-years, respectively. The increased risk of fracture was found in LC cohort after adjustment (HR 1.83, 95% CI 1.67-2.01). We also found significant associations between fracture risk and LC in males (HR 2.04, 95% CI 1.81-2.31), females (HR 1.53, 95% CI 1.32-1.78), and people aged 20-39 (HR 2.12, 95% CI 1.59-2.81), 40-49 (HR 2.04, 95% CI 1.63-2.54), 50-59 (HR 1.67, 95% CI 1.34-2.07), 60-69 (HR 1.69, 95% CI 1.38-2.06), and  $\geq 70$  years (HR 1.70, 95% CI 1.41-2.03).

Among 688,560 hospitalized fracture patients, patients with LC had lower proportions of young adults ( $p<0.0001$ ) but higher proportions of males ( $p<0.0001$ ) and low-income status ( $p<0.0001$ ). More history of mental disorders, diabetes, chronic obstructive pulmonary

1  
2  
3  
4 disease, ischemic heart disease, stroke, congestive heart failure, Parkinson's disease, and renal  
5  
6  
7 dialysis were found in patients with LC than in control ( $p<0.05$  for all). Fracture patients with  
8  
9  
10 previous LC had higher proportions of neck or trunk fracture ( $p<0.0001$ ) and lower limb  
11  
12  
13 fracture ( $p<0.0001$ ).

14  
15 Higher risks for post-fracture sepsis (OR 1.76, 95% CI 1.59-1.95), acute renal failure (OR  
16  
17  
18 1.67, 95% CI 1.37-2.04), and 30-day in-hospital mortality (OR 1.64, 95% CI 1.40-1.93) were  
19  
20  
21 associated with previous LC (Table 4). Fracture patients with LC had higher mean length of  
22  
23  
24 hospital stay ( $9.6\pm 10.5$  vs.  $8.5\pm 13.8$  days,  $p<0.0001$ ) and medical expenditure ( $2500\pm 2743$  vs.  
25  
26  
27  $2212\pm 2550$  USD,  $p<0.0001$ ) than patients without LC.

28  
29  
30 Previous LC was associated with higher risks of adverse events after fracture (Table 5) in  
31  
32  
33 females (OR 2.01, 95% CI 1.75-2.32), males (OR 1.62, 95% CI 1.46-1.80), and patients aged  
34  
35  
36 30-39 (OR 1.82, 95% CI 1.34-2.49), 40-49 (OR 2.25, 95% CI 1.83-2.75), 50-59 (OR 1.89,  
37  
38  
39 95% CI 1.53-2.34), 60-69 (OR 1.99, 95% CI 1.59-2.48), and  $\geq 70$  years (OR 1.42, 95% CI  
40  
41  
42 1.25-1.62). Associations between post-fracture adverse events and LC were significant in  
43  
44  
45 patients with fracture receiving surgery (OR 2.17, 95% CI 1.92-2.45), traumatic brain injury  
46  
47  
48 (OR 1.60, 95% CI 1.35-1.90), or fracture of upper limb (OR 1.77, 95% CI 1.44-2.17), lower  
49  
50  
51 limb (OR 1.80, 95% CI 1.61-2.02), and neck or trunk (OR 1.42, 95% CI 1.16-1.73).

52  
53 Among fracture patients with LC (Table 6), alcohol dependence syndrome (OR 1.96, 95%  
54  
55  
56 CI 1.57-2.44), jaundice (OR 3.17, 95% CI 2.44-4.13), ascites (OR 2.52, 95% CI 2.10-3.01),  
57  
58  
59

1  
2  
3  
4 gastrointestinal hemorrhage (OR 2.10, 95% CI 1.80-2.46), and hepatic coma (OR 2.80, 95%  
5  
6  
7 CI 2.30-3.41) were significant determinants for post-fracture adverse events. A biological  
8  
9  
10 gradient relationship was found between number of cirrhotic indicators and post-fracture  
11  
12  
13 adverse events (OR 2.87, 95% CI 1.60-5.15).  
14  
15  
16  
17  
18  
19  
20  
21  
22  
23  
24  
25  
26  
27  
28  
29  
30  
31  
32  
33  
34  
35  
36  
37  
38  
39  
40  
41  
42  
43  
44  
45  
46  
47  
48  
49  
50  
51  
52  
53  
54  
55  
56  
57  
58  
59  
60

For peer review only



## DISCUSSION

In this retrospective cohort study among adult patients, we observed a significant association between LC and fracture, with an 83% increased risk of fracture in patients with LC during the 5-8 years of follow-up. We also observed that patients with LC had significantly higher post-fracture complications and mortality in the nested cohort study. Clinical indicators of the severity of LC, such as alcohol dependence syndrome, jaundice, ascites, gastrointestinal hemorrhage, and hepatic coma were all associated with more post-fracture adverse events.

In general, the prevalence of LC was higher in males than in females.[4,24] Older age and low socioeconomic status were factors associated with higher risk of LC.[3,23,25] Older age, males, and low income were also risk factors for fracture, and were adjusted by using the multivariate Cox proportional models to control these potential confounding effects for the analysis of association between LC and fracture risk.[26] Furthermore, we found that the association between LC and fracture risk remains significant in every age group and both sexes. The significant impact of LC on post-fracture adverse events was noted in males, females, various age, and people with various types of fracture. This phenomenon revealed the possible causal inference that LC was associated with fracture risk and post-fracture adverse events from the viewpoint of epidemiology. These findings were crucial because several previous studies were limited by focusing on specific population by failing to

1  
2  
3  
4 investigate the association in subgroup analysis.[14-17,19,20]  
5

6 Mental disorders, hypertension, chronic obstructive pulmonary disease, diabetes, ischemic  
7  
8 heart disease, stroke, hyperlipidemia, congestive heart failure, renal dialysis and Parkinson's  
9  
10 disease were considered as co-existing medical conditions that also were fracture risk  
11  
12 factors.[21,22,27-29,30-32] Confounding bias may occurred in previous studies that lacked  
13  
14 multivariate adjustment for these fracture-related and/or cirrhosis-related medical conditions.  
15  
16 These were adjusted using multiple Cox proportional hazard and multiple logistic regression  
17  
18 models to investigate the risks and outcomes of fracture in patients with LC.[12-18]  
19  
20  
21  
22  
23  
24  
25

26 Unlike previous investigations, we studied the impact of LC on post-fracture outcomes  
27  
28 such as septicemia, acute renal failure, and mortality.[12-20] Fracture patients with history of  
29  
30 LC had longer hospital stay and medical expenditure than non-LC people in the nested cohort  
31  
32 study. Patients with LC had circulatory dysfunction and poor immune systems that  
33  
34 compromise systemic inflammatory response and make them prone to renal failure and  
35  
36 septicemia,[23,33] particularly those patients with cirrhotic indicators such as alcohol  
37  
38 dependence syndrome, jaundice, ascites, gastrointestinal hemorrhage, and hepatic coma.  
39  
40 Therefore, higher mortality and consumption of medical resources might be encountered in  
41  
42 the LC population during fracture admissions.  
43  
44  
45  
46  
47  
48  
49  
50  
51

52 Associations between LC and fracture risk suggest several possible explanations. First,  
53  
54 many studies found LC patients had increased risk of osteoporosis,[9-11] a condition that is  
55  
56  
57  
58  
59  
60

1  
2  
3  
4 an important determinant for fracture.[8] Fracture due to bone loss and the pathogenesis of  
5  
6 osteoporosis among patients with LC is complex and multifactorial, and the exact mechanism  
7  
8 remains uncertain. A previous study showed cirrhotic patients with osteoporosis had lower  
9  
10 levels of insulin-like growth factor-1 than cirrhotic patients without osteoporosis.[34]  
11  
12 Insulin-like growth factor-1 plays a major role in bone remodeling and maintenance of bone  
13  
14 mass, and was found to be reduced in advanced cirrhosis.[35] Cirrhotic patients'  
15  
16 hyperbilirubinemia also has been shown to impair osteoblast proliferation, resulting in  
17  
18 decreased bone formation and possibly accounting for the increased risks of fracture.[36]  
19  
20 Second, corticosteroids are frequently used in patients with autoimmune hepatitis and other  
21  
22 inflammatory disorders. Even budesonide, a corticosteroid with minimal systemic availability,  
23  
24 might lead to accelerated bone loss in cirrhotic patients and postmenopausal women.[37] We  
25  
26 postulated that medications used in the treatment of LC could also have an adverse effect on  
27  
28 bone and calcium mobilization and subsequent osteoporosis. Third, hepatic coma, poor  
29  
30 cognitive function, and psychiatric illness may play roles in the association between LC and  
31  
32 risk of fracture.[25,38] Though hepatic encephalopathy does not commonly occur in patients  
33  
34 with LC, its contribution to falls should not be ignored.[39]  
35  
36  
37  
38  
39  
40  
41  
42  
43  
44  
45  
46  
47  
48

49  
50 Some study limitations need to be addressed when interpreting the present results. First,  
51  
52 this study used retrospective reimbursement claims, which lack data on severity of LC,  
53  
54  
55  
56 lifestyle factors, personal characteristics, and biochemical data. Second, since the patients  
57  
58  
59  
60

1  
2  
3  
4 were selected based on diagnoses from hospital inpatient care registers, patients with minor  
5  
6 LC but no symptoms might not seek medical services, leading to underestimation of fracture  
7  
8 risk in LC patients because some minor LC patients may have been in the non-LC group.  
9  
10  
11  
12 Third, because our results are based on the data from Taiwan's National Health Insurance,  
13  
14 findings of this study could not be directly generalized to other populations.  
15  
16

### 17 18 **Conclusion** 19

20  
21 Our two cohort studies provide population-based evidence that LC is an important risk  
22  
23 factor for fracture. We also noted that fracture patients with various clinical indicators of LC  
24  
25 severity face increased risks of post-fracture adverse events. We demonstrated risk factor  
26  
27 analysis and a variety of clinical suggestions, including prevention, risk assessment and  
28  
29 outcome-related information to fracture patients with LC. Strategies to prevent fracture and  
30  
31 meticulous care to reduce post-fracture adverse events should be routinely considered for this  
32  
33 population.  
34  
35  
36  
37  
38  
39  
40  
41  
42  
43  
44  
45  
46  
47  
48  
49  
50  
51  
52  
53  
54  
55  
56  
57  
58  
59  
60

## REFERENCES

1. Lozano R, Naghavi M, Foreman K, Lim S, Shibuya K, Aboyans V, et al. Global and regional mortality from 235 causes of death for 20 age groups in 1990 and 2010: a systematic analysis for the Global Burden of Disease Study 2010. *Lancet*. 2012;380:2095-128.
2. Blachier M, Leleu H, Peck-Radosavljevic M, Valla DC, Roudot-Thoraval F. The burden of liver disease in Europe: a review of available epidemiological data. *J Hepatol*. 2013;58:593-608.
3. Scaglione S, Kliethermes S, Cao G, Shoham D, Durazo R, Luke A, et al. The epidemiology of cirrhosis in the United States: a population-based study. *J Clin Gastroenterol*. 2015;49:690-6.
4. Fleming KM, Aithal GP, Solaymani-Dodaran M, Card TR, West J. Incidence and prevalence of cirrhosis in the United Kingdom, 1992-2001: a general population-based study. *J Hepatol*. 2008;49:732-8.
5. Nguyen GC, Segev DL, Thuluvath PJ. Nationwide increase in hospitalizations and hepatitis C among inpatients with cirrhosis and sequelae of portal hypertension. *Clin Gastroenterol Hepatol*. 2007;5:1092-9.
6. Tsochatzis EA, Bosch J, Burroughs AK. Liver cirrhosis. *Lancet*. 2014;383:1749-61.
7. Bliuc D, Nguyen ND, Milch VE, Nguyen TV, Eisman JA, Center JR. Mortality risk

- 1  
2  
3  
4 associated with low-trauma osteoporotic fracture and subsequent fracture in men and  
5  
6  
7 women. *JAMA*. 2009;301:513-21.
- 8  
9  
10 8. Burge R, Dawson-Hughes B, Solomon DH, Wong JB, King A, Tosteson A. Incidence and  
11  
12 economic burden of osteoporosis-related fractures in the United States, 2005-2025. *J Bone*  
13  
14 *Miner Res*. 2007;22:465-75.
- 15  
16  
17  
18 9. Lupoli R, Di Minno A, Spadarella G, Ambrosino P, Panico A, Tarantino L, et al. The risk  
19  
20 of osteoporosis in patients with liver cirrhosis: a meta-analysis of literature studies. *Clin*  
21  
22 *Endocrinol*. 2016;84:30-8.
- 23  
24  
25  
26  
27 10. Guañabens N, Parés A, Ros I, Caballería L, Pons F, Vidal S, et al. Severity of cholestasis  
28  
29 and advanced histological stage but not menopausal status are the major risk factors for  
30  
31 osteoporosis in primary biliary cirrhosis. *J Hepatol*. 2005;42:573-7.
- 32  
33  
34  
35  
36 11. Mounach A, Ouzzif Z, Wariaghli G, Achemlal L, Benbaghdadi I, Aouragh A, et al. Primary  
37  
38 biliary cirrhosis and osteoporosis: a case-control study. *J Bone Miner Metab*.  
39  
40  
41 2008;26:379-84.
- 42  
43  
44  
45 12. Boulton-Jones JR, Fenn RM, West J, Logan RF, Ryder SD. Fracture risk of women with  
46  
47 primary biliary cirrhosis: no increase compared with general population controls. *Aliment*  
48  
49 *Pharmacol Ther*. 2004;20:551-7.
- 50  
51  
52  
53 13. Bang UC, Benfield T, Bendtsen F, Hyldstrup L, Beck Jensen JE. The risk of fractures  
54  
55 among patients with cirrhosis or chronic pancreatitis. *Clin Gastroenterol Hepatol*.
- 56  
57  
58  
59  
60

- 1  
2  
3  
4 2014;12:320-6.  
5  
6  
7 14. Román E1, Córdoba J, Torrens M, Guarner C, Soriano G. Falls and cognitive dysfunction  
8  
9 impair health-related quality of life in patients with cirrhosis. *Eur J Gastroenterol Hepatol*.  
10  
11 2013;25:77-84.  
12  
13  
14 15. Solaymani-Dodaran M, Card TR, Aithal GP, West J. Fracture risk in people with primary  
15  
16 biliary cirrhosis: a population-based cohort study. *Gastroenterology*. 2006;131:1752-7.  
17  
18  
19  
20 16. Guañabens N, Cerdá D, Monegal A, Pons F, Caballería L, Peris P, et al. Low bone mass  
21  
22 and severity of cholestasis affect fracture risk in patients with primary biliary cirrhosis.  
23  
24  
25  
26  
27 *Gastroenterology*. 2010;138:2348-56.  
28  
29  
30 17. Frith J, Kerr S, Robinson L, Elliott C, Ghazala C, Wilton K, et al. Primary biliary cirrhosis  
31  
32 is associated with falls and significant fall related injury. *QJM*. 2010;103:153-61.  
33  
34  
35  
36 18. Soriano G, Román E, Córdoba J, Torrens M, Poca M, Torras X, et al. Cognitive  
37  
38 dysfunction in cirrhosis is associated with falls: a prospective study. *Hepatology*.  
39  
40  
41 2012;55:1922-30.  
42  
43  
44 19. Tapper EB, Risech-Neyman Y, Sengupta N. Psychoactive medications increase the risk of  
45  
46 falls and fall-related injuries in hospitalized patients with cirrhosis. *Clin Gastroenterol*  
47  
48  
49  
50 *Hepatol*. 2015;13:1670-5.  
51  
52  
53 20. Tsai CF, Liu CJ, Chen TJ, Chu CJ, Lin HC, Lee FY, et al. Increased incidence of  
54  
55 orthopedic fractures in cirrhotic patients: a nationwide population-based study. *J Hepatol*.  
56  
57  
58  
59  
60

1  
2  
3  
4 2013;58:706-14.

- 5  
6  
7 21. Huang YF, Cherng YG, Hsu SP, Yeh CC, Chou YC, Wu CH, et al. Risk and adverse  
8  
9 outcomes of fractures in patients with Parkinson's disease: two nationwide studies.  
10  
11 *Osteoporos Int.* 2015;26:1723-32.  
12  
13  
14  
15 22. Liao CC, Lin CS, Shih CC, Yeh CC, Chang YC, Lee YW, et al. Increased risk of fracture  
16  
17 and postfracture adverse events in patients with diabetes: two nationwide population-based  
18  
19 retrospective cohort studies. *Diabetes Care.* 2014;37:2246-52.  
20  
21  
22  
23  
24 23. Lin CS, Lin SY, Chang CC, Wang HH, Liao CC, Chen TL. Postoperative adverse  
25  
26 outcomes after non-hepatic surgery in patients with liver cirrhosis. *Br J Surg.*  
27  
28  
29 2013;100:1784-90.  
30  
31  
32  
33 24. Scaglione S, Kliethermes S, Cao G, Shoham D, Durazo R, Luke A, et al. The  
34  
35 epidemiology of cirrhosis in the United States: a population-based study. *J Clin*  
36  
37  
38  
39  
40  
41  
42 25. Bajaj JS, Riggio O, Allampati S, Prakash R, Gioia S, Onori E, et al. Cognitive dysfunction  
43  
44 is associated with poor socioeconomic status in patients with cirrhosis: an international  
45  
46 multicenter study. *Clin Gastroenterol Hepatol.* 2013;11:1511-6.  
47  
48  
49  
50 26. Trimpou P, Landin-Wilhelmsen K, Odén A, Rosengren A, Wilhelmsen L. Male risk factors  
51  
52 for hip fracture-a 30-year follow-up study in 7,495 men. *Osteoporos Int.* 2010;21:409-16.  
53  
54  
55  
56 27. Jepsen P, Vilstrup H, Lash TL. Development and validation of a comorbidity scoring  
57  
58  
59  
60



- 1  
2  
3  
4 system for patients with cirrhosis. *Gastroenterology*. 2014;146:147-56.  
5  
6  
7 28. Gershwin ME, Selmi C, Worman HJ, Gold EB, Watnik M, Utts J, et al. Risk factors and  
8  
9 comorbidities in primary biliary cirrhosis: a controlled interview-based study of 1032  
10  
11 patients. *Hepatology*. 2005;42:1194-202.  
12  
13  
14  
15 29. Tryc AB, Goldbecker A, Berding G, Rümke S, Afshar K, Shahrezaei GH, et al.  
16  
17 Cirrhosis-related Parkinsonism: prevalence, mechanisms and response to treatments. *J*  
18  
19 *Hepatol*. 2013;58:698-705.  
20  
21  
22  
23  
24 30. Dennison EM, Compston JE, Flahive J, Siris ES, Gehlbach SH, Adachi JD, et al. Effect of  
25  
26 co-morbidities on fracture risk: findings from the Global Longitudinal Study of  
27  
28 Osteoporosis in Women (GLOW). *Bone*. 2012;50:1288-93.  
29  
30  
31  
32  
33 31. Hippisley-Cox J, Coupland C. Derivation and validation of updated QFracture algorithm  
34  
35 to predict risk of osteoporotic fracture in primary care in the United Kingdom: prospective  
36  
37 open cohort study. *BMJ*. 2012;344:e3427.  
38  
39  
40  
41  
42 32. Dennison EM, Compston JE, Flahive J, Siris ES, Gehlbach SH, Adachi JD, et al. Effect of  
43  
44 co-morbidities on fracture risk: findings from the Global Longitudinal Study of  
45  
46 Osteoporosis in Women (GLOW). *Bone*. 2012;50:1288-93.  
47  
48  
49  
50 33. Gines P, Schrier RW. Renal failure in cirrhosis. *N Engl J Med*. 2009;361:1279-90.  
51  
52  
53  
54 34. Gallego-Rojo FJ, Gonzalez-Calvin JL, Muñoz-Torres M, Mundi JL, Fernandez-Perez R,  
55  
56 Rodrigo-Moreno D. Bone mineral density, serum insulin-like growth factor I, and bone  
57  
58  
59  
60

- 1  
2  
3  
4 turnover markers in viral cirrhosis. *Hepatology*. 1998;28:695-9.  
5  
6  
7 35. Leslie WD, Bernstein CN, Leboff MS. AGA technical review on osteoporosis in hepatic  
8  
9 disorders. *Gastroenterology*. 2003;125:941-66.  
10  
11  
12 36. Janes CH, Dickson ER, Okazaki R, Bonde S, McDonagh AF, Riggs BL. Role of  
13  
14 hyperbilirubinemia in the impairment of osteoblast proliferation associated with  
15  
16 cholestatic jaundice. *J Clin Invest*. 1995;95:2581-6.  
17  
18  
19 37. Angulo P, Jorgensen RA, Keach JC, Dickson ER, Smith C, Lindor KD. Oral budesonide in  
20  
21 the treatment of patients with primary biliary cirrhosis with a suboptimal response to  
22  
23 ursodeoxycholic acid. *Hepatology*. 2000;31:318-23.  
24  
25  
26 38. Van Os E, van den Broek WW, Mulder PG, ter Borg PC, Bruijn JA, van Buuren HR.  
27  
28 Depression in patients with primary biliary cirrhosis and primary sclerosing cholangitis. *J*  
29  
30 *Hepatol*. 2007;46:1099-103.  
31  
32  
33 39. Román E, Córdoba J, Torrens M, Torras X, Villanueva C, Vargas V, et al. Minimal hepatic  
34  
35 encephalopathy is associated with falls. *Am J Gastroenterol*. 2011;106:476-82.  
36  
37  
38  
39  
40  
41  
42  
43  
44  
45  
46  
47  
48  
49  
50  
51  
52  
53  
54  
55  
56  
57  
58  
59  
60

1  
2  
3  
4 **Acknowledgments:** This study is based in part on data obtained from the National Health  
5  
6 Insurance Research Database provided by the Bureau of National Health Insurance, Ministry  
7  
8 of Health and Welfare, and managed by the National Health Research Institutes. The  
9  
10 interpretation and conclusions contained herein do not represent those of the Bureau of  
11  
12 National Health Insurance, Ministry of Health and Welfare, or National Health Research  
13  
14 Institutes.  
15  
16  
17  
18  
19

20  
21 **Competing interests:** None.  
22

23  
24 **Financial support:** This research was supported in part by Shuang Ho Hospital, Taipei  
25  
26 Medical University (104TMU-SHH-23), Taiwan's Ministry of Science and Technology  
27  
28 (MOST105-2629-B-038-001; MOST105-2314-B-038-025; MOST104-2314-B-038-027-MY2;  
29  
30 NSC102-2314-B-038-021-MY3), and Taiwan's Ministry of Health and Welfare Clinical Trial  
31  
32 and Research Center of Excellence (MOHW105-TDU-B-212-133019).  
33  
34  
35  
36  
37

38  
39 **Data sharing statement:** dataset available from the Taiwan's National Health Research  
40  
41 Institutes (<http://nhird.nhri.org.tw/index1.php>).  
42  
43

44  
45 **Author contribution:** All the authors revised and approved the contents of the submitted  
46  
47 article. TLC and CCL created the idea of the manuscript and wrote the draft. CCL conducted  
48  
49 statistical analysis of data. All the authors made substantial contributions to interpretation of  
50  
51 data and carried out a critical revision of the manuscript for important intellectual content.  
52  
53  
54  
55  
56  
57  
58  
59  
60

**Table 1** Sociodemographics, coexisting medical conditions, and medication use in people with and without liver cirrhosis

|                               | Non-liver cirrhosis<br>(N=15764) |        | Liver cirrhosis<br>(N=3941) |        | <i>P</i> value |
|-------------------------------|----------------------------------|--------|-----------------------------|--------|----------------|
|                               | n                                | (%)    | N                           | (%)    |                |
| Sex                           |                                  |        |                             |        | 1.0000         |
| Female                        | 4980                             | (31.6) | 1245                        | (31.6) |                |
| Male                          | 10784                            | (68.4) | 2696                        | (68.4) |                |
| Age, years                    |                                  |        |                             |        | 1.0000         |
| 20-29                         | 620                              | (3.9)  | 155                         | (3.9)  |                |
| 30-39                         | 1924                             | (12.2) | 481                         | (12.2) |                |
| 40-49                         | 3628                             | (23.0) | 907                         | (23.0) |                |
| 50-59                         | 3624                             | (23.0) | 906                         | (23.0) |                |
| 60-69                         | 3320                             | (21.1) | 830                         | (21.1) |                |
| ≥70                           | 2648                             | (16.8) | 662                         | (16.8) |                |
| Low income                    | 362                              | (2.3)  | 211                         | (5.3)  | <0.0001        |
| Coexisting medical conditions |                                  |        |                             |        |                |
| Mental disorders              | 3974                             | (25.2) | 1437                        | (36.5) | <0.0001        |
| Hypertension                  | 5248                             | (33.3) | 1406                        | (35.7) | 0.0046         |
| COPD                          | 2892                             | (18.4) | 992                         | (25.2) | <0.0001        |
| Diabetes                      | 2242                             | (14.2) | 944                         | (24.0) | <0.0001        |
| Ischemic heart disease        | 2623                             | (16.6) | 788                         | (20.0) | <0.0001        |
| Stroke                        | 941                              | (6.0)  | 338                         | (8.6)  | <0.0001        |
| Hyperlipidemia                | 1468                             | (9.3)  | 294                         | (7.5)  | 0.0003         |
| Congestive heart failure      | 453                              | (2.9)  | 255                         | (6.5)  | <0.0001        |
| Renal dialysis                | 123                              | (0.8)  | 112                         | (2.8)  | <0.0001        |
| Parkinson's disease           | 255                              | (1.6)  | 105                         | (2.7)  | <0.0001        |
| Medication use                |                                  |        |                             |        |                |
| Anxiolytics                   | 5756                             | (36.5) | 2550                        | (64.7) | <0.0001        |
| Antipsychotics                | 1559                             | (9.9)  | 805                         | (20.4) | <0.0001        |
| Antiepileptics                | 1547                             | (9.8)  | 773                         | (19.6) | <0.0001        |
| Antidepressants               | 1656                             | (10.5) | 743                         | (18.9) | <0.0001        |
| Oral steroids                 | 2549                             | (16.2) | 672                         | (17.1) | 0.1806         |

COPD = chronic obstructive pulmonary disease.

1  
2  
3  
4  
5  
6  
7  
8  
9  
10  
11  
12  
13  
14  
15  
16  
17  
18  
19  
20  
21  
22  
23  
24  
25  
26  
27  
28  
29  
30  
31  
32  
33  
34  
35  
36  
37  
38  
39  
40  
41  
42  
43  
44  
45  
46  
47  
48  
49

**Table 2** Risk of fracture events for cohorts with and without liver cirrhosis<sup>3</sup>

|                  | People without liver cirrhosis |              |        |                        | People with liver cirrhosis |              |        |                        | Risk of fracture         |
|------------------|--------------------------------|--------------|--------|------------------------|-----------------------------|--------------|--------|------------------------|--------------------------|
|                  | n                              | Person-years | Events | Incidence <sup>1</sup> | n                           | Person-years | Events | Incidence <sup>1</sup> | HR (95% CI) <sup>2</sup> |
| All              | 15764                          | 95430        | 1641   | 17.2                   | 3941                        | 23221        | 675    | 29.1                   | 1.83 (1.67-2.01)         |
| Female           | 4980                           | 29405        | 718    | 24.4                   | 1245                        | 7352         | 249    | 33.9                   | 1.53 (1.32-1.78)         |
| Male             | 10784                          | 66025        | 923    | 14.0                   | 2696                        | 15869        | 426    | 26.8                   | 2.04 (1.81-2.31)         |
| Age, 20-39 years | 2544                           | 15955        | 183    | 11.5                   | 636                         | 3838         | 97     | 25.3                   | 2.12 (1.59-2.81)         |
| Age, 40-49 years | 3628                           | 22574        | 295    | 13.1                   | 907                         | 5601         | 142    | 25.4                   | 2.04 (1.63-2.54)         |
| Age, 50-59 years | 3624                           | 21828        | 332    | 15.2                   | 906                         | 5442         | 124    | 22.8                   | 1.67 (1.34-2.07)         |
| Age, 60-69 years | 3320                           | 20111        | 373    | 18.5                   | 830                         | 4903         | 144    | 29.4                   | 1.69 (1.38-2.06)         |
| Age, ≥70 years   | 2648                           | 14963        | 458    | 30.6                   | 662                         | 3437         | 168    | 48.9                   | 1.70 (1.41-2.03)         |

CI = confidence intervals; HR = hazard ratio.

<sup>1</sup>Per 1000 person-years.

<sup>2</sup>People with liver cirrhosis vs. people without liver cirrhosis; Cox proportional hazard model with adjustment for all covariates in Table 1.

<sup>3</sup>In the subgroup analysis, the HRs of traumatic brain injury, neck or trunk fracture, fracture of upper limb, fracture of lower limb, and hip fracture associated with liver cirrhosis were 2.28 (95% CI 1.66-3.14), 1.75 (95% CI 1.44-2.12), 1.78 (95% CI 1.52-2.08), 1.94 (95% CI 1.65-2.27), and 2.22 (95% CI 1.70-2.89), respectively.

**Table 3** Characteristics of fracture patients with and without liver cirrhosis

|                               | Liver cirrhosis |        |              |        | <i>P</i> |
|-------------------------------|-----------------|--------|--------------|--------|----------|
|                               | No (N=680706)   |        | Yes (N=7584) |        |          |
|                               | n               | (%)    | n            | (%)    |          |
| Age, years                    |                 |        |              |        | <0.0001  |
| 20-29                         | 78164           | (11.5) | 82           | (1.1)  |          |
| 30-39                         | 71008           | (10.4) | 718          | (9.5)  |          |
| 40-49                         | 83951           | (12.3) | 1433         | (18.9) |          |
| 50-59                         | 110315          | (16.2) | 1400         | (18.5) |          |
| 60-69                         | 96376           | (14.2) | 1136         | (15.0) |          |
| ≥70                           | 240892          | (35.4) | 2815         | (37.1) |          |
| Sex                           |                 |        |              |        | <0.0001  |
| Female                        | 330440          | (48.5) | 2586         | (34.1) |          |
| Male                          | 350266          | (51.5) | 4998         | (65.9) |          |
| Low income                    | 23243           | (3.4)  | 607          | (8.0)  | <0.0001  |
| Medical center                | 181324          | (26.6) | 1585         | (20.9) | <0.0001  |
| Coexisting medical conditions |                 |        |              |        |          |
| Mental disorders              | 102874          | (15.1) | 2027         | (26.7) | <0.0001  |
| Hypertension                  | 135984          | (20.0) | 1604         | (21.2) | 0.0111   |
| Diabetes                      | 82560           | (12.1) | 1543         | (20.4) | <0.0001  |
| COPD                          | 55169           | (8.1)  | 876          | (11.6) | <0.0001  |
| Ischemic heart disease        | 47174           | (6.9)  | 650          | (8.6)  | <0.0001  |
| Stroke                        | 26507           | (3.9)  | 512          | (6.8)  | <0.0001  |
| Congestive heart failure      | 13287           | (2.0)  | 359          | (4.7)  | <0.0001  |
| Parkinson's disease           | 17991           | (2.6)  | 230          | (3.0)  | 0.0355   |
| Renal dialysis                | 7564            | (1.1)  | 230          | (3.0)  | <0.0001  |
| Hyperlipidemia                | 22779           | (3.4)  | 120          | (1.6)  | <0.0001  |
| Type of fracture              |                 |        |              |        |          |
| Fracture with surgery         | 482458          | (70.9) | 4040         | (53.3) | <0.0001  |
| Traumatic brain injury        | 119165          | (17.5) | 1263         | (16.7) | 0.0520   |
| Fracture of neck and trunk    | 97677           | (14.4) | 1500         | (19.8) | <0.0001  |
| Fracture of upper limb        | 256356          | (37.7) | 2285         | (30.1) | <0.0001  |
| Fracture of lower limb        | 322161          | (47.3) | 3807         | (50.2) | <0.0001  |

COPD = chronic obstructive pulmonary disease.

**Table 4** Adverse events after fracture in patients with liver cirrhosis

|                                | No LC, %  | LC, %     | OR (95% CI)*     |
|--------------------------------|-----------|-----------|------------------|
| 30-day in-hospital mortality   | 1.2       | 2.2       | 1.64 (1.40-1.93) |
| Septicemia                     | 2.5       | 5.5       | 1.76 (1.59-1.95) |
| Acute renal failure            | 0.7       | 1.4       | 1.67 (1.37-2.04) |
| Medical expenditure, USD†      | 2212±2550 | 2500±2743 | p<0.0001         |
| Length of hospital stay, days† | 8.5±13.8  | 9.6±10.5  | p<0.0001         |

CI = confidence interval; LC = liver cirrhosis; OR = odds ratio.

\*Adjusted for age, sex, low income, medical center, coexisting medical conditions and types of fracture.

†Mean±SD

**Table 5** Liver cirrhosis associated with post-fracture adverse events in the stratification analysis by age, sex, and type of fracture

|                         | People without liver cirrhosis |         |           | People with liver cirrhosis |         |           | Risk of events*  |
|-------------------------|--------------------------------|---------|-----------|-----------------------------|---------|-----------|------------------|
|                         | n                              | Events* | Incidence | n                           | Events* | Incidence | OR (95% CI)†     |
| Female                  | 330440                         | 11082   | 3.4       | 2586                        | 219     | 8.5       | 2.01 (1.75-2.32) |
| Male                    | 350266                         | 15863   | 4.5       | 4998                        | 402     | 8.0       | 1.62 (1.46-1.80) |
| Age, 20-29 years        | 78164                          | 1862    | 2.4       | 82                          | 6       | 7.3       | 2.21 (0.94-5.21) |
| Age, 30-39 years        | 71008                          | 1698    | 2.4       | 718                         | 47      | 6.6       | 1.82 (1.34-2.49) |
| Age, 40-49 years        | 83951                          | 2215    | 2.6       | 1433                        | 118     | 8.2       | 2.25 (1.83-2.75) |
| Age, 50-59 years        | 110315                         | 3053    | 2.8       | 1400                        | 99      | 7.1       | 1.89 (1.53-2.34) |
| Age, 60-69 years        | 96376                          | 3362    | 3.5       | 1136                        | 92      | 8.1       | 1.99 (1.59-2.48) |
| Age, ≥70 years          | 240892                         | 14755   | 6.1       | 2815                        | 259     | 9.2       | 1.42 (1.25-1.62) |
| Fracture with surgery   | 482458                         | 12709   | 2.6       | 4040                        | 297     | 7.4       | 2.17 (1.92-2.45) |
| Traumatic brain injury  | 119165                         | 8617    | 7.2       | 1263                        | 157     | 12.4      | 1.60 (1.35-1.90) |
| Neck and trunk fracture | 97677                          | 4864    | 5.0       | 1500                        | 107     | 7.1       | 1.42 (1.16-1.73) |
| Upper limb fracture     | 256356                         | 4706    | 1.8       | 2285                        | 104     | 4.6       | 1.77 (1.44-2.17) |
| Lower limb fracture     | 322161                         | 14467   | 4.5       | 3807                        | 351     | 9.2       | 1.80 (1.61-2.02) |

CI = confidence interval; OR = odds ratio.

\*Any adverse events included 30-day in-hospital mortality, septicemia, and acute renal failure.

†Adjusted for all covariates in Table 3.



**Table 6** Cirrhosis-related clinical indicators' effect after fracture outcomes for patients with liver cirrhosis

|                                 | 30-day in-hospital adverse events* |        |              |                  |
|---------------------------------|------------------------------------|--------|--------------|------------------|
|                                 | n                                  | events | incidence, % | OR (95% CI)†     |
| No LC                           | 680706                             | 26945  | 4.0          | 1.00 (reference) |
| Effects of ADS                  |                                    |        |              |                  |
| LC without ADS                  | 6397                               | 530    | 8.3          | 1.71 (1.56-1.88) |
| LC with ADS                     | 1187                               | 91     | 7.7          | 1.96 (1.57-2.44) |
| Effects of jaundice             |                                    |        |              |                  |
| LC without jaundice             | 7013                               | 554    | 7.9          | 1.65 (1.51-1.81) |
| LC with jaundice                | 571                                | 67     | 11.7         | 3.17 (2.44-4.13) |
| Effects of ascites              |                                    |        |              |                  |
| LC without ascites              | 6337                               | 479    | 7.6          | 1.60 (1.45-1.76) |
| LC with ascites                 | 1247                               | 142    | 11.4         | 2.52 (2.10-3.01) |
| Effects of GI hemorrhage        |                                    |        |              |                  |
| LC without GI hemorrhage        | 5688                               | 439    | 7.7          | 1.63 (1.48-1.80) |
| LC with GI hemorrhage           | 1896                               | 182    | 9.6          | 2.10 (1.80-2.46) |
| Effects of hepatic coma         |                                    |        |              |                  |
| LC without hepatic coma         | 6587                               | 503    | 7.6          | 1.60 (1.46-1.76) |
| LC with hepatic coma            | 997                                | 118    | 11.8         | 2.80 (2.30-3.41) |
| Number of cirrhotic indicators‡ |                                    |        |              |                  |
| 0                               | 3772                               | 254    | 6.7          | 1.37 (1.20-1.56) |
| 1                               | 2378                               | 206    | 8.7          | 1.84 (1.59-2.13) |
| 2                               | 944                                | 105    | 11.1         | 2.67 (2.17-3.30) |
| 3                               | 359                                | 43     | 12.0         | 2.98 (2.15-4.14) |
| ≥4                              | 131                                | 13     | 9.9          | 2.87 (1.60-5.15) |

ADS, alcohol dependence syndrome; CI, confidence interval; GI, gastrointestinal; LC, liver cirrhosis; OR, odds ratio.

\*Any adverse events included with 30-day in-hospital mortality, septicemia, acute renal failure.

†Adjusted for all covariates in Table 3.

‡Liver-related illnesses include alcohol dependence syndrome, ascites, jaundice, gastrointestinal hemorrhage, and hepatic coma.

**STROBE 2007 (v4) checklist of items to be included in reports of observational studies in epidemiology\***  
**Checklist for cohort, case-control, and cross-sectional studies (combined)**

| Section/Topic             | Item # | Recommendation                                                                                                                                                                                                                                                                                                                                                                                                                                                         | Reported on page # |
|---------------------------|--------|------------------------------------------------------------------------------------------------------------------------------------------------------------------------------------------------------------------------------------------------------------------------------------------------------------------------------------------------------------------------------------------------------------------------------------------------------------------------|--------------------|
| Title and abstract        | 1      | (a) Indicate the study's design with a commonly used term in the title or the abstract                                                                                                                                                                                                                                                                                                                                                                                 | 1, 3               |
|                           |        | (b) Provide in the abstract an informative and balanced summary of what was done and what was found                                                                                                                                                                                                                                                                                                                                                                    | 3                  |
| <b>Introduction</b>       |        |                                                                                                                                                                                                                                                                                                                                                                                                                                                                        |                    |
| Background/rationale      | 2      | Explain the scientific background and rationale for the investigation being reported                                                                                                                                                                                                                                                                                                                                                                                   | 4                  |
| Objectives                | 3      | State specific objectives, including any pre-specified hypotheses                                                                                                                                                                                                                                                                                                                                                                                                      | 4, 5               |
| <b>Methods</b>            |        |                                                                                                                                                                                                                                                                                                                                                                                                                                                                        |                    |
| Study design              | 4      | Present key elements of study design early in the paper                                                                                                                                                                                                                                                                                                                                                                                                                | 6                  |
| Setting                   | 5      | Describe the setting, locations, and relevant dates, including periods of recruitment, exposure, follow-up, and data collection                                                                                                                                                                                                                                                                                                                                        | 6, 7               |
| Participants              | 6      | (a) <i>Cohort study</i> —Give the eligibility criteria, and the sources and methods of selection of participants. Describe methods of follow-up<br><i>Case-control study</i> —Give the eligibility criteria, and the sources and methods of case ascertainment and control selection. Give the rationale for the choice of cases and controls<br><i>Cross-sectional study</i> —Give the eligibility criteria, and the sources and methods of selection of participants | 6, 7               |
|                           |        | (b) <i>Cohort study</i> —For matched studies, give matching criteria and number of exposed and unexposed<br><i>Case-control study</i> —For matched studies, give matching criteria and the number of controls per case                                                                                                                                                                                                                                                 | 6, 7               |
| Variables                 | 7      | Clearly define all outcomes, exposures, predictors, potential confounders, and effect modifiers. Give diagnostic criteria, if applicable                                                                                                                                                                                                                                                                                                                               | 7, 8, 9            |
| Data sources/ measurement | 8*     | For each variable of interest, give sources of data and details of methods of assessment (measurement). Describe comparability of assessment methods if there is more than one group                                                                                                                                                                                                                                                                                   | 7, 8, 9            |
| Bias                      | 9      | Describe any efforts to address potential sources of bias                                                                                                                                                                                                                                                                                                                                                                                                              | 7, 8, 9            |
| Study size                | 10     | Explain how the study size was arrived at                                                                                                                                                                                                                                                                                                                                                                                                                              | 7, 8, 9            |
| Quantitative variables    | 11     | Explain how quantitative variables were handled in the analyses. If applicable, describe which groupings were chosen and why                                                                                                                                                                                                                                                                                                                                           | 7, 8, 9            |
| Statistical methods       | 12     | (a) Describe all statistical methods, including those used to control for confounding                                                                                                                                                                                                                                                                                                                                                                                  | 7, 8, 9            |
|                           |        | (b) Describe any methods used to examine subgroups and interactions                                                                                                                                                                                                                                                                                                                                                                                                    | 7, 8, 9            |
|                           |        | (c) Explain how missing data were addressed                                                                                                                                                                                                                                                                                                                                                                                                                            | 7, 8, 9            |
|                           |        | (d) <i>Cohort study</i> —If applicable, explain how loss to follow-up was addressed<br><i>Case-control study</i> —If applicable, explain how matching of cases and controls was addressed                                                                                                                                                                                                                                                                              | 7, 8, 9            |

|                          |     |                                                                                                                                                                                                              |            |
|--------------------------|-----|--------------------------------------------------------------------------------------------------------------------------------------------------------------------------------------------------------------|------------|
|                          |     | <i>Cross-sectional study</i> —If applicable, describe analytical methods taking account of sampling strategy                                                                                                 |            |
|                          |     | (e) Describe any sensitivity analyses                                                                                                                                                                        | 7, 8, 9    |
| <b>Results</b>           |     |                                                                                                                                                                                                              |            |
| Participants             | 13* | (a) Report numbers of individuals at each stage of study—eg numbers potentially eligible, examined for eligibility, confirmed eligible, included in the study, completing follow-up, and analysed            | 10, 11, 12 |
|                          |     | (b) Give reasons for non-participation at each stage                                                                                                                                                         | 10, 11, 12 |
|                          |     | (c) Consider use of a flow diagram                                                                                                                                                                           | 10, 11, 12 |
| Descriptive data         | 14* | (a) Give characteristics of study participants (eg demographic, clinical, social) and information on exposures and potential confounders                                                                     | 10, 11, 12 |
|                          |     | (b) Indicate number of participants with missing data for each variable of interest                                                                                                                          | 10, 11, 12 |
|                          |     | (c) <i>Cohort study</i> —Summarise follow-up time (eg, average and total amount)                                                                                                                             | 10, 11, 12 |
| Outcome data             | 15* | <i>Cohort study</i> —Report numbers of outcome events or summary measures over time                                                                                                                          | 10, 11, 12 |
|                          |     | <i>Case-control study</i> —Report numbers in each exposure category, or summary measures of exposure                                                                                                         | 10, 11, 12 |
|                          |     | <i>Cross-sectional study</i> —Report numbers of outcome events or summary measures                                                                                                                           | 10, 11, 12 |
| Main results             | 16  | (a) Give unadjusted estimates and, if applicable, confounder-adjusted estimates and their precision (eg, 95% confidence interval). Make clear which confounders were adjusted for and why they were included | 10, 11, 12 |
|                          |     | (b) Report category boundaries when continuous variables were categorized                                                                                                                                    | 10, 11, 12 |
|                          |     | (c) If relevant, consider translating estimates of relative risk into absolute risk for a meaningful time period                                                                                             | 10, 11, 12 |
| Other analyses           | 17  | Report other analyses done—eg analyses of subgroups and interactions, and sensitivity analyses                                                                                                               | 10, 11, 12 |
| <b>Discussion</b>        |     |                                                                                                                                                                                                              |            |
| Key results              | 18  | Summarise key results with reference to study objectives                                                                                                                                                     | 13         |
| Limitations              | 19  | Discuss limitations of the study, taking into account sources of potential bias or imprecision. Discuss both direction and magnitude of any potential bias                                                   | 16         |
| Interpretation           | 20  | Give a cautious overall interpretation of results considering objectives, limitations, multiplicity of analyses, results from similar studies, and other relevant evidence                                   | 13-16      |
| Generalisability         | 21  | Discuss the generalisability (external validity) of the study results                                                                                                                                        | 13-16      |
| <b>Other information</b> |     |                                                                                                                                                                                                              |            |
| Funding                  | 22  | Give the source of funding and the role of the funders for the present study and, if applicable, for the original study on which the present article is based                                                | 23         |

\*Give information separately for cases and controls in case-control studies and, if applicable, for exposed and unexposed groups in cohort and cross-sectional studies.

**Note:** An Explanation and Elaboration article discusses each checklist item and gives methodological background and published examples of transparent reporting. The STROBE checklist is best used in conjunction with this article (freely available on the Web sites of PLoS Medicine at <http://www.plosmedicine.org/>, Annals of Internal Medicine at <http://www.annals.org/>, and Epidemiology at <http://www.epidem.com/>). Information on the STROBE Initiative is available at [www.strobe-statement.org](http://www.strobe-statement.org).

# BMJ Open

## Risk and adverse outcomes of fractures in patients with liver cirrhosis: two nationwide retrospective cohort studies

|                                 |                                                                                                                                                                                                                                                                                                                                                                                                                                                                                                                                                                                                                                                                                                                                                                                     |
|---------------------------------|-------------------------------------------------------------------------------------------------------------------------------------------------------------------------------------------------------------------------------------------------------------------------------------------------------------------------------------------------------------------------------------------------------------------------------------------------------------------------------------------------------------------------------------------------------------------------------------------------------------------------------------------------------------------------------------------------------------------------------------------------------------------------------------|
| Journal:                        | <i>BMJ Open</i>                                                                                                                                                                                                                                                                                                                                                                                                                                                                                                                                                                                                                                                                                                                                                                     |
| Manuscript ID                   | bmjopen-2017-017342.R1                                                                                                                                                                                                                                                                                                                                                                                                                                                                                                                                                                                                                                                                                                                                                              |
| Article Type:                   | Research                                                                                                                                                                                                                                                                                                                                                                                                                                                                                                                                                                                                                                                                                                                                                                            |
| Date Submitted by the Author:   | 27-Jul-2017                                                                                                                                                                                                                                                                                                                                                                                                                                                                                                                                                                                                                                                                                                                                                                         |
| Complete List of Authors:       | Chen, Ta-Liang; Taipei Medical University Hospital, Department of Anesthesiology<br>Lin, Chao-Shun; Taipei Medical University Hospital, Department of Anesthesiology<br>Shih, Chun-Chuan; I-Shou University, School of Chinese Medicine for Post-Baccalaureate<br>Huang, Yu-Feng; Mackay Memorial Hospital Taitung Branch Hospital, Department of Anesthesiology<br>Yeh, Chun-Chieh; University of Illinois, Department of Surgery<br>Wu, Chih-Hsing; National Cheng Kung University Hospital, Family Medicine<br>Cherng, Yih-Giun; Shuang Ho Hospital, Taipei Medical University, Department of Anesthesiology<br>Liao, Chien-Chang; Taipei Medical University Hospital, Department of Anesthesiology; Taipei Medical University, Department of Anesthesiology, School of Medicine |
| <b>Primary Subject Heading</b>: | Epidemiology                                                                                                                                                                                                                                                                                                                                                                                                                                                                                                                                                                                                                                                                                                                                                                        |
| Secondary Subject Heading:      | Gastroenterology and hepatology, Rehabilitation medicine                                                                                                                                                                                                                                                                                                                                                                                                                                                                                                                                                                                                                                                                                                                            |
| Keywords:                       | liver cirrhosis, fracture, risk, outcome                                                                                                                                                                                                                                                                                                                                                                                                                                                                                                                                                                                                                                                                                                                                            |
|                                 |                                                                                                                                                                                                                                                                                                                                                                                                                                                                                                                                                                                                                                                                                                                                                                                     |

SCHOLARONE™  
Manuscripts

1  
2  
3  
4 **Risk and adverse outcomes of fractures in patients with liver cirrhosis: two nationwide**  
5  
6  
7 **retrospective cohort studies**  
8

9 Ta-Liang Chen,<sup>1,2,3</sup> Chao-Shun Lin,<sup>1,2,3</sup> Chun-Chuan Shih,<sup>4</sup> Yu-Feng Huang,<sup>5</sup> Chun-Chieh

10  
11  
12 Yeh,<sup>6,7</sup> Chih-Hsing Wu,<sup>8</sup> Yih-Giun Cherng,<sup>3,9</sup> Chien-Chang Liao<sup>1,2,3,9,10</sup>  
13

14  
15 <sup>1</sup>Department of Anesthesiology, Taipei Medical University Hospital, Taipei, Taiwan  
16

17  
18 <sup>2</sup>Anesthesiology and Health Policy Research Center, Taipei Medical University Hospital,  
19

20  
21 Taipei, Taiwan  
22

23  
24 <sup>3</sup>Department of Anesthesiology, School of Medicine, College of Medicine, Taipei Medical  
25

26  
27 University, Taipei, Taiwan  
28

29  
30 <sup>4</sup>The School of Chinese Medicine for Post-Baccalaureate, I-Shou University, Kaohsiung,  
31

32  
33 Taiwan  
34

35  
36 <sup>5</sup>Department of Anesthesiology, Taitung Mackay Memorial Hospital, Taitung, Taiwan  
37

38  
39 <sup>6</sup>Department of Surgery, China Medical University Hospital, Taichung, Taiwan  
40

41  
42 <sup>7</sup>Department of Surgery, University of Illinois, Chicago, United States of America  
43

44  
45 <sup>8</sup>Department of Family Medicine, National Cheng Kung University Hospital, Tainan, Taiwan  
46

47  
48 <sup>9</sup>Department of Anesthesiology, Shuan Ho Hospital, Taipei Medical University, New Taipei  
49

50  
51 City, Taiwan  
52

53  
54 <sup>10</sup>School of Chinese Medicine, College of Chinese Medicine, China Medical University,  
55

56  
57 Taichung, Taiwan  
58  
59  
60

1  
2  
3  
4 Correspondence:

5  
6 Chien-Chang Liao, PhD, MPH

7  
8  
9 Associate Professor

10  
11 Department of Anesthesiology, Taipei Medical University Hospital

12  
13 252 Wuxing St., Taipei 11031, Taiwan

14  
15  
16  
17  
18 Tel: 886-2-2737-2181, ext. 8310

19  
20  
21 Fax: 886-2-2736-7344

22  
23  
24 E-mail: jacky48863027@yahoo.com.tw; ccliao@tmu.edu.tw

25  
26  
27 Abstract: 236 words; Text: 2243 words; References: 39

28  
29  
30 **Running head:** Liver cirrhosis and fracture

31  
32  
33 **Abbreviations:** CI=confidence interval; HR=hazard ratio; ICD-9-CM=International

34  
35  
36 Classification of Diseases, Ninth Revision, Clinical Modification; LC=liver cirrhosis;

37  
38  
39 OR=odds ratio

40  
41  
42 **Key Words:** liver cirrhosis; fracture; risk; outcomes

**Abstract**

**Objective:** The aim of this study is to evaluate fracture risk and post-fracture outcomes in patients with and without liver cirrhosis (LC).

**Design:** Retrospective cohort study and nested fracture cohort study.

**Setting:** This study was based on Taiwan's National Health Insurance Research Database that included information on: (1) 3941 patients with aged 20 years and older newly diagnosed with LC between 2000 and 2003; (2) 688,560 hospitalized fracture patients aged 20 years and older between 2006 and 2013.

**Primary and secondary outcome measures:** Followed-up events of fracture from 2000 until 2008 were noted from medical claims to evaluate adjusted hazard ratios (HRs) and 95% confidence intervals (CIs) of fracture associated with LC. Adjusted odds ratios (ORs) and 95% CIs of adverse events after fracture were compared among patients with and without LC

**Results:** The incidences of fracture for people with and without LC were 28.0 and 16.9 per 1000 person-years, respectively. Compared with control, the adjusted HR of fracture was 1.71 (95% CI 1.55-1.87) for LC patients. Previous LC was associated with risks of septicemia (OR 1.87, 95% CI 1.68-2.0), acute renal failure (OR 1.77, 95% CI 1.43-2.18), and 30-day in-hospital mortality (OR 1.71, 95% CI 1.45-2.01) after fracture.

**Conclusion:** LC was associated with higher risk of fracture; LC patients in particular had more complications and 30-day in-hospital mortality after fracture. Fracture prevention and

1  
2  
3  
4 attention to post-fracture adverse events are needed for these susceptible populations.  
5  
6  
7  
8  
9  
10  
11  
12  
13  
14  
15  
16  
17  
18  
19  
20  
21  
22  
23  
24  
25  
26  
27  
28  
29  
30  
31  
32  
33  
34  
35  
36  
37  
38  
39  
40  
41  
42  
43  
44  
45  
46  
47  
48  
49  
50  
51  
52  
53  
54  
55  
56  
57  
58  
59  
60

For peer review only



1  
2  
3  
4 Strengths of this study  
5

6 (1) Our study is a longitudinal retrospective cohort with large sample size.  
7

8  
9 (2) We used frequency matching and multivariate Cox proportional hazard models to control  
10  
11  
12 the confounding bias.  
13

14  
15 (3) This is the first study with comprehensive assessment of the impact of liver cirrhosis on  
16  
17  
18 the fracture risk and outcomes.  
19

20  
21 Limitations of this study  
22

23  
24 (1) Our data lack of clinical risk scores, lesion characteristics, biochemical measures, and  
25  
26  
27 lifestyles of fracture patients and cirrhosis patients.  
28

29  
30 (2) The detailed lifestyle included smoking, alcohol drinking, and physical activity were not  
31  
32  
33 available.  
34  
35  
36  
37  
38  
39  
40  
41  
42  
43  
44  
45  
46  
47  
48  
49  
50  
51  
52  
53  
54  
55  
56  
57  
58  
59  
60

## INTRODUCTION

Liver cirrhosis (LC) is the fourth-most-common cause of death in Europe, and causes more than one million deaths every year worldwide.[1,2] Prevalence of LC increased 68% during the 1992-2001 decade in the UK; in the US, it remains a pandemic chronic disease with more than 600,000 patients in 1999-2010 whose economic burden was shown to have doubled during 1998 and 2003.[3-5] Although the epidemiology, pathogenesis, prevention, and treatment of LC have been studied,[6] complications of liver cirrhosis are not well understood.

Fracture causes disability and mortality, and places economic burdens on societies.[7,8] Since many studies found patients with LC had increased risk of osteoporosis,[9-11] fall and fracture were considered complications for patients with LC.[12-20] However, these studies did not compare the risk of fracture or falls between people with and without LC. Small sample size,[12,14-18] inadequate control for confounding factors,[12-18] case-control study design,[12,14,16-19] focus on specific population,[12] lack of control group,[14,16,18,19] and of subgroup analysis [14-17,19,20] limited previous investigations. Information also was lacking on whether LC is associated with post-fracture adverse outcomes.

With the use of reimbursement claims from Taiwan's National Health Insurance program, we conducted two nationwide cohort studies. The retrospective cohort study seeks to validate the risk of fracture in patients with LC. Whether LC was associated with adverse outcomes

1  
2  
3  
4  
5  
6  
7  
8  
9  
10  
11  
12  
13  
14  
15  
16  
17  
18  
19  
20  
21  
22  
23  
24  
25  
26  
27  
28  
29  
30  
31  
32  
33  
34  
35  
36  
37  
38  
39  
40  
41  
42  
43  
44  
45  
46  
47  
48  
49  
50  
51  
52  
53  
54  
55  
56  
57  
58  
59  
60

after fracture was reported in the nested fracture cohort study.

For peer review only

## **METHODS**

### **Source of data**

This study used the claims data of Taiwan's National Health Insurance Program, which was implemented in March 1995 and covers 99% of 23 million people nationwide. The National Health Research Institutes (NHRI) established the National Health Insurance Research Database to record all beneficiaries' information about inpatient and outpatient medical services. This includes basic patient demographics, physician's primary and secondary diagnoses, treatment procedures, prescribed medications, and medical expenditures. All contracted medical clinics, hospitals and medical centers are required to submit computerized claim documents for medical expenses. The validity of this database has been favorably evaluated, and research articles based on it have been accepted in scientific journals worldwide.[21-23]

### **Ethical approval**

Insurance reimbursement claims used in this study were decoded with patient identifications scrambled for further research access. This study was conducted in accordance with the Helsinki Declaration. Although NHRI regulations do not require informed consent because patient identification has been decoded for privacy, this study also was approved by Taiwan's National Health Research Institutes (NHIRD-103-121) and Taipei Medical University's Joint Institutional Review Board (TMU-JIRB-201705063;

1  
2  
3  
4 TMU-JIRB-201705084).

5  
6  
7 **Study design**

8  
9  
10 This investigation included two studies. In Study I (the retrospective cohort study), our  
11  
12 purpose is to evaluate the risk of fracture for people with and without LC. From the  
13  
14 representative sample of 1,000,000 insurance enrollees, we required at least two visits for  
15  
16 medical care with the physician's primary diagnosis of cirrhosis of the liver to identify a  
17  
18 cohort of 3941 newly diagnosed adults aged  $\geq 20$  years in 2000-2003. Those with only one  
19  
20 medical visit with physician's diagnosis of liver cirrhosis were not considered as cirrhotic  
21  
22 cases in this study. The frequency-matching procedure (by age and sex) was used to select the  
23  
24 cohort, who had no previous medical records of LC. Both LC and non-LC cohorts had no  
25  
26 history of fracture between the index date (date of LC diagnosis) and January 1, 1996 (the  
27  
28 starting date of the Taiwan's National Health Insurance Program). That is to say, there was no  
29  
30 recorded previous fracture from onset of database (1996) until the date of enrollment to the  
31  
32 study (2000-2003). The outcome of this retrospective cohort study is incident event of  
33  
34 fracture that was identified during the follow-up period from the index date until the end of  
35  
36 2008 for LC and non-LC cohorts.  
37  
38  
39  
40  
41  
42  
43  
44  
45  
46  
47  
48  
49

50 In Study II (the nested fracture cohort study), our purpose is to evaluate the outcomes after  
51  
52 fracture in fracture patients with and without history of LC. The study II included 688,560  
53  
54 hospitalized fracture patients in 2004-2013 and we identified 7854 with history of LC  
55  
56  
57  
58  
59  
60

1  
2  
3  
4 (defined as at least two visits for medical care with the physician's primary diagnosis of liver  
5  
6  
7 cirrhosis) within pre-fracture 24 months. Thirty-day in-hospital mortality, septicemia, and  
8  
9  
10 acute renal failure after fracture were considered as post-fracture outcomes and compared  
11  
12  
13 between fracture patients with and without LC in the nested fracture cohort study.

### 14 15 **Measurements and definitions**

16  
17  
18 The variables in Study I and Study II were defined and described as followings. Patients'  
19  
20  
21 age was calculated by the date of fracture admission. Low-income status was determined by  
22  
23  
24 the National Health Insurance Bureau, which validates those qualified for waived health-care  
25  
26  
27 co-payment. Following previous suggestions,[21,22] fracture-associated medications were  
28  
29  
30 also analyzed; these included anxiolytics, antiepileptics, antipsychotics, antidepressants, and  
31  
32  
33 oral steroids. We used the *International Classification of Diseases, Ninth Revision, Clinical*  
34  
35  
36 *Modification* (ICD-9-CM) and administration codes of Taiwan's National Health Insurance to  
37  
38  
39 examine the physician's diagnoses and medical services. The coexisting medical conditions  
40  
41  
42 were calculated within 24 months before fracture admission. We identified patients' medical  
43  
44  
45 conditions and complications such as mental disorders (ICD-9-CM 290-319), hypertension  
46  
47  
48 (ICD-9-CM 410-405), chronic obstructive pulmonary disease (ICD-9-CM 490-496), diabetes  
49  
50  
51 (ICD-9-CM 250), ischemic heart disease (ICD-9-CM 410-414), stroke (ICD-9-CM 430-438),  
52  
53  
54 hyperlipidemia (ICD-9-CM 272.0, 272.1, and 272.2), heart failure (ICD-9-CM 428), renal  
55  
56  
57 dialysis (D8, D9), Parkinson's disease (ICD-9-CM 332), liver cirrhosis (ICD-9-CM 571.2,  
58  
59  
60

1  
2  
3  
4 571.5, and 571.6), fracture (ICD-9-CM 800-829), sepsis (ICD-9-CM 038 and 998.5), and  
5  
6  
7 acute renal failure (ICD-9-CM 548). Types of fracture included traumatic brain injury  
8  
9 (ICD-9-CM 800-804), fracture of neck and trunk (ICD-9-CM 805-809), fracture of upper  
10  
11 limb (ICD-9-CM 810-819), and fracture of lower limb (ICD-9-CM 820-829) were also  
12  
13 identified. Thirty-day in-hospital mortality is the main outcome in the nested fracture cohort  
14  
15 study. In the Study I, we identified co-existing medical conditions and medications in the  
16  
17 baseline (before the enrollment date within 2 years) and follow-up period. In the Study II, we  
18  
19 identified co-existing medical conditions and medications before fracture admission within 2  
20  
21 years.  
22  
23  
24  
25  
26  
27  
28  
29

### 30 **Statistical analysis**

31  
32  
33 In Study I, the categorical data for cohorts with and without LC were analyzed by  
34  
35 chi-square tests. The adjusted hazard ratios (HRs) and confidence intervals (CIs) of fracture  
36  
37 risk associated with liver cirrhosis were calculated in the multiple Cox proportional hazard  
38  
39 models with controlling for age, sex, low income, mental disorders, hypertension, chronic  
40  
41 obstructive pulmonary disease, diabetes, ischemic heart disease, stroke, hyperlipidemia,  
42  
43 congestive heart failure, renal dialysis, Parkinson's disease, anxiolytics, antipsychotics,  
44  
45 antiepileptics, antidepressants, and oral steroids, as were associations between LC and  
46  
47 fracture risk in males, females, and every age group.  
48  
49  
50  
51  
52  
53  
54

55  
56 In Study II, we used chi-square tests to examine other sociodemographic factors and  
57  
58  
59  
60

1  
2  
3  
4 medical conditions in hospitalized fracture patients with and without history of LC. The  
5  
6  
7 multiple logistic regressions were used to calculate adjusted odds ratios (ORs) and 95% CIs of  
8  
9  
10 30-day in-hospital mortality, sepsis, and acute renal failure after fracture associated with  
11  
12 history of LC with controlling for age, sex, low income, mental disorders, hypertension,  
13  
14 diabetes, chronic obstructive pulmonary disease, ischemic heart disease, stroke, congestive  
15  
16 heart failure, Parkinson's disease, renal dialysis, hyperlipidemia, and types of fracture.  
17  
18  
19  
20  
21  
22  
23  
24  
25  
26  
27  
28  
29  
30  
31  
32  
33  
34  
35  
36  
37  
38  
39  
40  
41  
42  
43  
44  
45  
46  
47  
48  
49  
50  
51  
52  
53  
54  
55  
56  
57  
58  
59  
60



## RESULTS

In Study I, there was no significant difference in age and sex between cohorts with and without LC because we used frequency-matching procedure (Table 1). The LC cohort had more medical conditions than the non-LC cohort; these included mental disorders ( $p<0.0001$ ), hypertension ( $p=0.0046$ ), chronic obstructive pulmonary disease ( $p<0.0001$ ), diabetes ( $p<0.0001$ ), ischemic heart disease ( $p<0.0001$ ), stroke ( $p<0.0001$ ), hyperlipidemia ( $p=0.0003$ ), heart failure ( $p<0.0001$ ), renal dialysis ( $p<0.0001$ ), and Parkinson's disease ( $p<0.0001$ ). The use of anxiolytics ( $p<0.0001$ ), antiepileptics ( $p<0.0001$ ), antipsychotics ( $p<0.0001$ ), and antidepressants ( $p<0.0001$ ) was also higher in patients with LC than in people without LC.

During the 5-8 years of follow-up (Study I), the incidences of fracture for cohorts with and without LC were 29.1 and 17.2 per 1000 person-years, respectively (Table 2). The increased risk of fracture was found in LC cohort after adjustment (HR 1.83, 95% CI 1.67-2.01). We also found significant associations between fracture risk and LC in males (HR 2.04, 95% CI 1.81-2.31), females (HR 1.53, 95% CI 1.32-1.78), and people aged 20-39 (HR 2.12, 95% CI 1.59-2.81), 40-49 (HR 2.04, 95% CI 1.63-2.54), 50-59 (HR 1.67, 95% CI 1.34-2.07), 60-69 (HR 1.69, 95% CI 1.38-2.06), and  $\geq 70$  years (HR 1.70, 95% CI 1.41-2.03).

The Study II included 688,560 hospitalized fracture patients (Table 3). Fracture patients with LC had lower proportions of young adults ( $p<0.0001$ ) but higher proportions of males ( $p<0.0001$ ) and low-income status ( $p<0.0001$ ). More history of mental disorders, diabetes,

1  
2  
3  
4 chronic obstructive pulmonary disease, ischemic heart disease, stroke, congestive heart failure,  
5  
6  
7 Parkinson's disease, and renal dialysis were found in patients with LC than in control ( $p<0.05$   
8  
9  
10 for all). Fracture patients with previous LC had higher proportions of neck or trunk fracture  
11  
12 ( $p<0.0001$ ) and lower limb fracture ( $p<0.0001$ ).  
13

14  
15 In Study II, higher risks for post-fracture sepsis (OR 1.76, 95% CI 1.59-1.95), acute renal  
16  
17 failure (OR 1.67, 95% CI 1.37-2.04), and 30-day in-hospital mortality (OR 1.64, 95% CI  
18  
19 1.40-1.93) were associated with previous LC (Table 4). Fracture patients with LC had higher  
20  
21 mean length of hospital stay ( $9.6\pm 10.5$  vs.  $8.5\pm 13.8$  days,  $p<0.0001$ ) and medical expenditure  
22  
23 ( $2500\pm 2743$  vs.  $2212\pm 2550$  USD,  $p<0.0001$ ) than patients without LC.  
24  
25  
26  
27  
28  
29

30 In Study II (Table 5), previous LC was associated with higher risks of adverse events after  
31  
32 fracture in females (OR 2.01, 95% CI 1.75-2.32), males (OR 1.62, 95% CI 1.46-1.80), and  
33  
34 patients aged 30-39 (OR 1.82, 95% CI 1.34-2.49), 40-49 (OR 2.25, 95% CI 1.83-2.75), 50-59  
35  
36 (OR 1.89, 95% CI 1.53-2.34), 60-69 (OR 1.99, 95% CI 1.59-2.48), and  $\geq 70$  years (OR 1.42,  
37  
38 95% CI 1.25-1.62). Associations between post-fracture adverse events and LC were  
39  
40  
41 significant in patients with fracture receiving surgery (OR 2.17, 95% CI 1.92-2.45), traumatic  
42  
43 brain injury (OR 1.60, 95% CI 1.35-1.90), or fracture of upper limb (OR 1.77, 95% CI  
44  
45 1.44-2.17), lower limb (OR 1.80, 95% CI 1.61-2.02), and neck or trunk (OR 1.42, 95% CI  
46  
47 1.16-1.73).  
48  
49  
50  
51  
52  
53  
54

55 The Study II showed that alcohol dependence syndrome (OR 1.96, 95% CI 1.57-2.44),  
56  
57  
58  
59  
60

1  
2  
3  
4 jaundice (OR 3.17, 95% CI 2.44-4.13), ascites (OR 2.52, 95% CI 2.10-3.01), gastrointestinal  
5  
6  
7 hemorrhage (OR 2.10, 95% CI 1.80-2.46), and hepatic coma (OR 2.80, 95% CI 2.30-3.41)  
8  
9  
10 were significant determinants for post-fracture adverse events (Table 6). The risk of  
11  
12 post-fracture adverse events increased with the number of cirrhotic indicators increased (OR  
13  
14  
15 2.87, 95% CI 1.60-5.15).  
16  
17  
18  
19  
20  
21  
22  
23  
24  
25  
26  
27  
28  
29  
30  
31  
32  
33  
34  
35  
36  
37  
38  
39  
40  
41  
42  
43  
44  
45  
46  
47  
48  
49  
50  
51  
52  
53  
54  
55  
56  
57  
58  
59  
60

## DISCUSSION

In Study I (the retrospective cohort study), we observed a significant association between LC and fracture, with an 83% increased risk of fracture in patients with LC during the 5-8 years of follow-up. In Study II (the nested fracture cohort study), we observed that patients with LC had significantly higher post-fracture complications and 30-day in-hospital mortality. Clinical indicators of the severity of LC, such as alcohol dependence syndrome, jaundice, ascites, gastrointestinal hemorrhage, and hepatic coma were all associated with more post-fracture adverse events.

In general, the prevalence of LC was higher in males than in females.[4,24] Older age and low socioeconomic status were factors associated with higher risk of LC.[3,23,25] Older age, males, and low income were also risk factors for fracture, and were controlled by using the multivariate Cox proportional models to control these potential confounding effects for the analysis of association between LC and fracture risk.[26] Furthermore, we found that the association between LC and fracture risk remains significant in every age group and both sexes. The significant impact of LC on post-fracture adverse events was noted in males, females, various age, and people with various types of fracture. This phenomenon revealed the possible causal inference that LC was associated with fracture risk and post-fracture adverse events from the viewpoint of epidemiology. These findings were crucial because several previous studies were limited by focusing on specific population by failing to

1  
2  
3  
4 investigate the association in subgroup analysis.[14-17,19,20]  
5

6 Mental disorders, hypertension, chronic obstructive pulmonary disease, diabetes, ischemic  
7  
8 heart disease, stroke, hyperlipidemia, congestive heart failure, renal dialysis and Parkinson's  
9  
10 disease were considered as co-existing medical conditions that also were fracture risk  
11  
12 factors.[21,22,27-29,30-32] Confounding bias may occurred in previous studies that lacked  
13  
14 multivariate adjustment for these fracture-related and/or cirrhosis-related medical  
15  
16 conditions.[12-18] Therefore, we used multiple Cox proportional hazard and multiple logistic  
17  
18 regression models to control the confounding effects of medical conditions when investigating  
19  
20 the risks and outcomes of fracture in patients with LC in Study I and Study II.  
21  
22  
23  
24  
25  
26  
27  
28  
29

30 Unlike previous investigations, we studied the impact of LC on post-fracture outcomes  
31  
32 such as septicemia, acute renal failure, and mortality.[12-20] Fracture patients with history of  
33  
34 LC had longer hospital stay and medical expenditure than non-LC people in the nested  
35  
36 fracture cohort study. Patients with LC had circulatory dysfunction and poor immune systems  
37  
38 that compromise systemic inflammatory response and make them prone to renal failure and  
39  
40 septicemia,[23,33] particularly those patients with cirrhotic indicators such as alcohol  
41  
42 dependence syndrome, jaundice, ascites, gastrointestinal hemorrhage, and hepatic coma.  
43  
44  
45  
46  
47  
48 Therefore, higher mortality and consumption of medical resources might be encountered in  
49  
50 the LC population during fracture admissions.  
51  
52  
53  
54

55 Associations between LC and fracture risk suggest several possible explanations. First,  
56  
57  
58  
59  
60

1  
2  
3  
4 many studies found LC patients had increased risk of osteoporosis,[9-11] a condition that is  
5  
6  
7 an important determinant for fracture.[8] Fracture due to bone loss and the pathogenesis of  
8  
9  
10 osteoporosis among patients with LC is complex and multifactorial, and the exact mechanism  
11  
12  
13 remains uncertain. A previous study showed cirrhotic patients with osteoporosis had lower  
14  
15  
16 levels of insulin-like growth factor-1 than cirrhotic patients without osteoporosis.[34]  
17  
18  
19 Insulin-like growth factor-1 plays a major role in bone remodeling and maintenance of bone  
20  
21  
22 mass, and was found to be reduced in advanced cirrhosis.[35] Cirrhotic patients'  
23  
24  
25 hyperbilirubinemia also has been shown to impair osteoblast proliferation, resulting in  
26  
27  
28 decreased bone formation and possibly accounting for the increased risks of fracture.[36]  
29  
30  
31 Second, corticosteroids are frequently used in patients with autoimmune hepatitis and other  
32  
33  
34 inflammatory disorders. Even budesonide, a corticosteroid with minimal systemic availability,  
35  
36  
37 might lead to accelerated bone loss in cirrhotic patients and postmenopausal women.[37] We  
38  
39  
40 postulated that medications used in the treatment of LC could also have an adverse effect on  
41  
42  
43 bone and calcium mobilization and subsequent osteoporosis. Third, hepatic coma, poor  
44  
45  
46 cognitive function, and psychiatric illness may play roles in the association between LC and  
47  
48  
49 risk of fracture.[25,38] Though hepatic encephalopathy does not commonly occur in patients  
50  
51  
52 with LC, its contribution to falls should not be ignored.[39]

53  
54  
55 Some study limitations need to be addressed when interpreting the present results. First,  
56  
57  
58 this study used retrospective reimbursement claims, which lack data on severity of LC,  
59  
60

1  
2  
3  
4 lifestyle factors, personal characteristics, and biochemical data. Compared with the previous  
5  
6 well-adjustment study [19], the above unavailable information is an important source of bias.  
7  
8  
9  
10 Second, since the patients were selected based on diagnoses from hospital inpatient care  
11  
12 registers, patients with minor LC but no symptoms might not seek medical services, leading  
13  
14 to underestimation of fracture risk in LC patients because some minor LC patients may have  
15  
16 been in the non-LC group. Third, because our results are based on the data from Taiwan's  
17  
18 National Health Insurance, findings of this study could not be directly generalized to other  
19  
20  
21  
22  
23  
24  
25  
26  
27  
28  
29  
30  
31  
32  
33  
34  
35  
36  
37  
38  
39  
40  
41  
42  
43  
44  
45  
46  
47  
48  
49  
50  
51  
52  
53  
54  
55  
56  
57  
58  
59  
60

populations.

## Conclusion

Our two cohort studies provide population-based evidence that LC is an important risk factor for fracture. We also noted that fracture patients with various clinical indicators of LC severity face increased risks of post-fracture adverse events. We demonstrated risk factor analysis and a variety of clinical suggestions, including prevention, risk assessment and outcome-related information to fracture patients with LC. Strategies to prevent fracture and meticulous care to reduce post-fracture adverse events should be routinely considered for this population.

**REFERENCES**

1. Lozano R, Naghavi M, Foreman K, Lim S, Shibuya K, Aboyans V, et al. Global and regional mortality from 235 causes of death for 20 age groups in 1990 and 2010: a systematic analysis for the Global Burden of Disease Study 2010. *Lancet*. 2012;380:2095-128.
2. Blachier M, Leleu H, Peck-Radosavljevic M, Valla DC, Roudot-Thoraval F. The burden of liver disease in Europe: a review of available epidemiological data. *J Hepatol*. 2013;58:593-608.
3. Scaglione S, Kliethermes S, Cao G, Shoham D, Durazo R, Luke A, et al. The epidemiology of cirrhosis in the United States: a population-based study. *J Clin Gastroenterol*. 2015;49:690-6.
4. Fleming KM, Aithal GP, Solaymani-Dodaran M, Card TR, West J. Incidence and prevalence of cirrhosis in the United Kingdom, 1992-2001: a general population-based study. *J Hepatol*. 2008;49:732-8.
5. Nguyen GC, Segev DL, Thuluvath PJ. Nationwide increase in hospitalizations and hepatitis C among inpatients with cirrhosis and sequelae of portal hypertension. *Clin Gastroenterol Hepatol*. 2007;5:1092-9.
6. Tsochatzis EA, Bosch J, Burroughs AK. Liver cirrhosis. *Lancet*. 2014;383:1749-61.
7. Bliuc D, Nguyen ND, Milch VE, Nguyen TV, Eisman JA, Center JR. Mortality risk



1  
2  
3  
4 associated with low-trauma osteoporotic fracture and subsequent fracture in men and  
5  
6 women. *JAMA*. 2009;301:513-21.  
7

8  
9  
10 8. Burge R, Dawson-Hughes B, Solomon DH, Wong JB, King A, Tosteson A. Incidence and  
11  
12 economic burden of osteoporosis-related fractures in the United States, 2005-2025. *J Bone*  
13  
14 *Miner Res*. 2007;22:465-75.  
15

16  
17  
18 9. Lupoli R, Di Minno A, Spadarella G, Ambrosino P, Panico A, Tarantino L, et al. The risk  
19  
20 of osteoporosis in patients with liver cirrhosis: a meta-analysis of literature studies. *Clin*  
21  
22 *Endocrinol*. 2016;84:30-8.  
23  
24  
25

26  
27 10. Guañabens N, Parés A, Ros I, Caballería L, Pons F, Vidal S, et al. Severity of cholestasis  
28  
29 and advanced histological stage but not menopausal status are the major risk factors for  
30  
31 osteoporosis in primary biliary cirrhosis. *J Hepatol*. 2005;42:573-7.  
32  
33  
34

35  
36 11. Mounach A, Ouzzif Z, Wariaghli G, Achemlal L, Benbaghdadi I, Aouragh A, et al. Primary  
37  
38 biliary cirrhosis and osteoporosis: a case-control study. *J Bone Miner Metab*.  
39  
40 2008;26:379-84.  
41  
42  
43

44  
45 12. Boulton-Jones JR, Fenn RM, West J, Logan RF, Ryder SD. Fracture risk of women with  
46  
47 primary biliary cirrhosis: no increase compared with general population controls. *Aliment*  
48  
49 *Pharmacol Ther*. 2004;20:551-7.  
50  
51

52  
53 13. Bang UC, Benfield T, Bendtsen F, Hyldstrup L, Beck Jensen JE. The risk of fractures  
54  
55 among patients with cirrhosis or chronic pancreatitis. *Clin Gastroenterol Hepatol*.  
56  
57  
58  
59  
60

- 1  
2  
3  
4 2014;12:320-6.  
5  
6  
7 14. Román E1, Córdoba J, Torrens M, Guarner C, Soriano G. Falls and cognitive dysfunction  
8  
9 impair health-related quality of life in patients with cirrhosis. *Eur J Gastroenterol Hepatol*.  
10  
11 2013;25:77-84.  
12  
13  
14 15. Solaymani-Dodaran M, Card TR, Aithal GP, West J. Fracture risk in people with primary  
15  
16 biliary cirrhosis: a population-based cohort study. *Gastroenterology*. 2006;131:1752-7.  
17  
18  
19  
20 16. Guañabens N, Cerdá D, Monegal A, Pons F, Caballería L, Peris P, et al. Low bone mass  
21  
22 and severity of cholestasis affect fracture risk in patients with primary biliary cirrhosis.  
23  
24  
25  
26  
27 *Gastroenterology*. 2010;138:2348-56.  
28  
29  
30 17. Frith J, Kerr S, Robinson L, Elliott C, Ghazala C, Wilton K, et al. Primary biliary cirrhosis  
31  
32 is associated with falls and significant fall related injury. *QJM*. 2010;103:153-61.  
33  
34  
35  
36 18. Soriano G, Román E, Córdoba J, Torrens M, Poca M, Torras X, et al. Cognitive  
37  
38 dysfunction in cirrhosis is associated with falls: a prospective study. *Hepatology*.  
39  
40  
41 2012;55:1922-30.  
42  
43  
44 19. Tapper EB, Risech-Neyman Y, Sengupta N. Psychoactive medications increase the risk of  
45  
46 falls and fall-related injuries in hospitalized patients with cirrhosis. *Clin Gastroenterol*  
47  
48  
49  
50 *Hepatol*. 2015;13:1670-5.  
51  
52  
53 20. Tsai CF, Liu CJ, Chen TJ, Chu CJ, Lin HC, Lee FY, et al. Increased incidence of  
54  
55 orthopedic fractures in cirrhotic patients: a nationwide population-based study. *J Hepatol*.  
56  
57  
58  
59  
60

1  
2  
3  
4 2013;58:706-14.

5  
6  
7 21. Huang YF, Cherng YG, Hsu SP, Yeh CC, Chou YC, Wu CH, et al. Risk and adverse  
8  
9 outcomes of fractures in patients with Parkinson's disease: two nationwide studies.  
10  
11  
12 *Osteoporos Int.* 2015;26:1723-32.

13  
14  
15 22. Liao CC, Lin CS, Shih CC, Yeh CC, Chang YC, Lee YW, et al. Increased risk of fracture  
16  
17 and postfracture adverse events in patients with diabetes: two nationwide population-based  
18  
19 retrospective cohort studies. *Diabetes Care.* 2014;37:2246-52.

20  
21  
22 23. Lin CS, Lin SY, Chang CC, Wang HH, Liao CC, Chen TL. Postoperative adverse  
23  
24 outcomes after non-hepatic surgery in patients with liver cirrhosis. *Br J Surg.*  
25  
26  
27 2013;100:1784-90.

28  
29  
30  
31  
32 24. Scaglione S, Kliethermes S, Cao G, Shoham D, Durazo R, Luke A, et al. The  
33  
34 epidemiology of cirrhosis in the United States: a population-based study. *J Clin*  
35  
36  
37  
38  
39 *Gastroenterol.* 2015;49:690-6.

40  
41  
42 25. Bajaj JS, Riggio O, Allampati S, Prakash R, Gioia S, Onori E, et al. Cognitive dysfunction  
43  
44 is associated with poor socioeconomic status in patients with cirrhosis: an international  
45  
46  
47 multicenter study. *Clin Gastroenterol Hepatol.* 2013;11:1511-6.

48  
49  
50 26. Trimpou P, Landin-Wilhelmsen K, Odén A, Rosengren A, Wilhelmsen L. Male risk factors  
51  
52 for hip fracture-a 30-year follow-up study in 7,495 men. *Osteoporos Int.* 2010;21:409-16.

53  
54  
55 27. Jepsen P, Vilstrup H, Lash TL. Development and validation of a comorbidity scoring  
56  
57  
58

- 1  
2  
3  
4 system for patients with cirrhosis. *Gastroenterology*. 2014;146:147-56.  
5  
6  
7 28. Gershwin ME, Selmi C, Worman HJ, Gold EB, Watnik M, Utts J, et al. Risk factors and  
8  
9 comorbidities in primary biliary cirrhosis: a controlled interview-based study of 1032  
10  
11 patients. *Hepatology*. 2005;42:1194-202.  
12  
13  
14  
15 29. Tryc AB, Goldbecker A, Berding G, Rümke S, Afshar K, Shahrezaei GH, et al.  
16  
17 Cirrhosis-related Parkinsonism: prevalence, mechanisms and response to treatments. *J*  
18  
19 *Hepatol*. 2013;58:698-705.  
20  
21  
22  
23  
24 30. Dennison EM, Compston JE, Flahive J, Siris ES, Gehlbach SH, Adachi JD, et al. Effect of  
25  
26 co-morbidities on fracture risk: findings from the Global Longitudinal Study of  
27  
28 Osteoporosis in Women (GLOW). *Bone*. 2012;50:1288-93.  
29  
30  
31  
32  
33 31. Hippisley-Cox J, Coupland C. Derivation and validation of updated QFracture algorithm  
34  
35 to predict risk of osteoporotic fracture in primary care in the United Kingdom: prospective  
36  
37 open cohort study. *BMJ*. 2012;344:e3427.  
38  
39  
40  
41  
42 32. Dennison EM, Compston JE, Flahive J, Siris ES, Gehlbach SH, Adachi JD, et al. Effect of  
43  
44 co-morbidities on fracture risk: findings from the Global Longitudinal Study of  
45  
46 Osteoporosis in Women (GLOW). *Bone*. 2012;50:1288-93.  
47  
48  
49  
50  
51 33. Gines P, Schrier RW. Renal failure in cirrhosis. *N Engl J Med*. 2009;361:1279-90.  
52  
53  
54  
55  
56 34. Gallego-Rojo FJ, Gonzalez-Calvin JL, Muñoz-Torres M, Mundi JL, Fernandez-Perez R,  
57  
58 Rodrigo-Moreno D. Bone mineral density, serum insulin-like growth factor I, and bone  
59  
60

1  
2  
3  
4 turnover markers in viral cirrhosis. *Hepatology*. 1998;28:695-9.  
5

6  
7 35. Leslie WD, Bernstein CN, Leboff MS. AGA technical review on osteoporosis in hepatic  
8  
9 disorders. *Gastroenterology*. 2003;125:941-66.  
10

11  
12 36. Janes CH, Dickson ER, Okazaki R, Bonde S, McDonagh AF, Riggs BL. Role of  
13  
14 hyperbilirubinemia in the impairment of osteoblast proliferation associated with  
15  
16 cholestatic jaundice. *J Clin Invest*. 1995;95:2581-6.  
17  
18

19  
20 37. Angulo P, Jorgensen RA, Keach JC, Dickson ER, Smith C, Lindor KD. Oral budesonide in  
21  
22 the treatment of patients with primary biliary cirrhosis with a suboptimal response to  
23  
24 ursodeoxycholic acid. *Hepatology*. 2000;31:318-23.  
25  
26  
27

28  
29 38. Van Os E, van den Broek WW, Mulder PG, ter Borg PC, Bruijn JA, van Buuren HR.  
30  
31 Depression in patients with primary biliary cirrhosis and primary sclerosing cholangitis. *J*  
32  
33 *Hepatol*. 2007;46:1099-103.  
34  
35  
36

37  
38 39. Román E, Córdoba J, Torrens M, Torras X, Villanueva C, Vargas V, et al. Minimal hepatic  
39  
40 encephalopathy is associated with falls. *Am J Gastroenterol*. 2011;106:476-82.  
41  
42  
43  
44  
45  
46  
47  
48  
49  
50  
51  
52  
53  
54  
55  
56  
57  
58  
59  
60

1  
2  
3  
4 **Acknowledgments:** This study is based in part on data obtained from the National Health  
5  
6 Insurance Research Database provided by the Bureau of National Health Insurance, Ministry  
7  
8 of Health and Welfare, and managed by the National Health Research Institutes. The  
9  
10 interpretation and conclusions contained herein do not represent those of the Bureau of  
11  
12 National Health Insurance, Ministry of Health and Welfare, or National Health Research  
13  
14 Institutes.  
15  
16  
17  
18  
19

20  
21 **Competing interests:** None.  
22

23  
24 **Financial support:** This research was supported in part by Shuang Ho Hospital, Taipei  
25  
26 Medical University (104TMU-SHH-23), Taiwan's Ministry of Science and Technology  
27  
28 (MOST105-2629-B-038-001; MOST105-2314-B-038-025; MOST104-2314-B-038-027-MY2;  
29  
30 NSC102-2314-B-038-021-MY3), and Taiwan's Ministry of Health and Welfare Clinical Trial  
31  
32 and Research Center of Excellence (MOHW105-TDU-B-212-133019).  
33  
34  
35  
36  
37

38  
39 **Data sharing statement:** dataset available from the Taiwan's National Health Research  
40  
41 Institutes (<http://nhird.nhri.org.tw/index1.php>).  
42  
43

44  
45 **Author contribution:** All the authors revised and approved the contents of the submitted  
46  
47 article. TLC and CCL created the idea of the manuscript and wrote the draft. CCL conducted  
48  
49 statistical analysis of data. All the authors made substantial contributions to interpretation of  
50  
51 data and carried out a critical revision of the manuscript for important intellectual content.  
52  
53  
54  
55  
56  
57  
58  
59  
60

**Table 1** Sociodemographics, coexisting medical conditions, and medication use in people with and without liver cirrhosis

|                               | Non-liver cirrhosis<br>(N=15764) |        | Liver cirrhosis<br>(N=3941) |        | <i>P</i> value |
|-------------------------------|----------------------------------|--------|-----------------------------|--------|----------------|
|                               | n                                | (%)    | N                           | (%)    |                |
| Sex                           |                                  |        |                             |        | 1.0000         |
| Female                        | 4980                             | (31.6) | 1245                        | (31.6) |                |
| Male                          | 10784                            | (68.4) | 2696                        | (68.4) |                |
| Age, years                    |                                  |        |                             |        | 1.0000         |
| 20-29                         | 620                              | (3.9)  | 155                         | (3.9)  |                |
| 30-39                         | 1924                             | (12.2) | 481                         | (12.2) |                |
| 40-49                         | 3628                             | (23.0) | 907                         | (23.0) |                |
| 50-59                         | 3624                             | (23.0) | 906                         | (23.0) |                |
| 60-69                         | 3320                             | (21.1) | 830                         | (21.1) |                |
| ≥70                           | 2648                             | (16.8) | 662                         | (16.8) |                |
| Low income                    | 362                              | (2.3)  | 211                         | (5.3)  | <0.0001        |
| Coexisting medical conditions |                                  |        |                             |        |                |
| Mental disorders              | 3974                             | (25.2) | 1437                        | (36.5) | <0.0001        |
| Hypertension                  | 5248                             | (33.3) | 1406                        | (35.7) | 0.0046         |
| COPD                          | 2892                             | (18.4) | 992                         | (25.2) | <0.0001        |
| Diabetes                      | 2242                             | (14.2) | 944                         | (24.0) | <0.0001        |
| Ischemic heart disease        | 2623                             | (16.6) | 788                         | (20.0) | <0.0001        |
| Stroke                        | 941                              | (6.0)  | 338                         | (8.6)  | <0.0001        |
| Hyperlipidemia                | 1468                             | (9.3)  | 294                         | (7.5)  | 0.0003         |
| Congestive heart failure      | 453                              | (2.9)  | 255                         | (6.5)  | <0.0001        |
| Renal dialysis                | 123                              | (0.8)  | 112                         | (2.8)  | <0.0001        |
| Parkinson's disease           | 255                              | (1.6)  | 105                         | (2.7)  | <0.0001        |
| Medication use                |                                  |        |                             |        |                |
| Anxiolytics                   | 5756                             | (36.5) | 2550                        | (64.7) | <0.0001        |
| Antipsychotics                | 1559                             | (9.9)  | 805                         | (20.4) | <0.0001        |
| Antiepileptics                | 1547                             | (9.8)  | 773                         | (19.6) | <0.0001        |
| Antidepressants               | 1656                             | (10.5) | 743                         | (18.9) | <0.0001        |
| Oral steroids                 | 2549                             | (16.2) | 672                         | (17.1) | 0.1806         |

COPD = chronic obstructive pulmonary disease.

**Table 2** Risk of fracture events for cohorts with and without liver cirrhosis<sup>3</sup>

|                  | People without liver cirrhosis |              |        |                        | People with liver cirrhosis |              |        |                        | Risk of fracture         |
|------------------|--------------------------------|--------------|--------|------------------------|-----------------------------|--------------|--------|------------------------|--------------------------|
|                  | n                              | Person-years | Events | Incidence <sup>1</sup> | n                           | Person-years | Events | Incidence <sup>1</sup> | HR (95% CI) <sup>2</sup> |
| All              | 15764                          | 95430        | 1641   | 17.2                   | 3941                        | 23221        | 675    | 29.1                   | 1.83 (1.67-2.01)         |
| Female           | 4980                           | 29405        | 718    | 24.4                   | 1245                        | 7352         | 249    | 33.9                   | 1.53 (1.32-1.78)         |
| Male             | 10784                          | 66025        | 923    | 14.0                   | 2696                        | 15869        | 426    | 26.8                   | 2.04 (1.81-2.31)         |
| Age, 20-39 years | 2544                           | 15955        | 183    | 11.5                   | 636                         | 3838         | 97     | 25.3                   | 2.12 (1.59-2.81)         |
| Age, 40-49 years | 3628                           | 22574        | 295    | 13.1                   | 907                         | 5601         | 142    | 25.4                   | 2.04 (1.63-2.54)         |
| Age, 50-59 years | 3624                           | 21828        | 332    | 15.2                   | 906                         | 5442         | 124    | 22.8                   | 1.67 (1.34-2.07)         |
| Age, 60-69 years | 3320                           | 20111        | 373    | 18.5                   | 830                         | 4903         | 144    | 29.4                   | 1.69 (1.38-2.06)         |
| Age, ≥70 years   | 2648                           | 14963        | 458    | 30.6                   | 662                         | 3437         | 168    | 48.9                   | 1.70 (1.41-2.03)         |

CI = confidence intervals; HR = hazard ratio.

<sup>1</sup>Per 1000 person-years.

<sup>2</sup>People with liver cirrhosis vs. people without liver cirrhosis; Cox proportional hazard model with controlling for all covariates listed in Table 1.

<sup>3</sup>In the subgroup analysis, the HRs of traumatic brain injury, neck or trunk fracture, fracture of upper limb, fracture of lower limb, and hip fracture associated with liver cirrhosis were 2.28 (95% CI 1.66-3.14), 1.75 (95% CI 1.44-2.12), 1.78 (95% CI 1.52-2.08), 1.94 (95% CI 1.65-2.27), and 2.22 (95% CI 1.70-2.89), respectively.



**Table 3** Characteristics of fracture patients with and without liver cirrhosis

|                               | Liver cirrhosis |        |              |        | <i>P</i> |
|-------------------------------|-----------------|--------|--------------|--------|----------|
|                               | No (N=680706)   |        | Yes (N=7584) |        |          |
|                               | n               | (%)    | n            | (%)    |          |
| Age, years                    |                 |        |              |        | <0.0001  |
| 20-29                         | 78164           | (11.5) | 82           | (1.1)  |          |
| 30-39                         | 71008           | (10.4) | 718          | (9.5)  |          |
| 40-49                         | 83951           | (12.3) | 1433         | (18.9) |          |
| 50-59                         | 110315          | (16.2) | 1400         | (18.5) |          |
| 60-69                         | 96376           | (14.2) | 1136         | (15.0) |          |
| ≥70                           | 240892          | (35.4) | 2815         | (37.1) |          |
| Sex                           |                 |        |              |        | <0.0001  |
| Female                        | 330440          | (48.5) | 2586         | (34.1) |          |
| Male                          | 350266          | (51.5) | 4998         | (65.9) |          |
| Low income                    | 23243           | (3.4)  | 607          | (8.0)  | <0.0001  |
| Medical center                | 181324          | (26.6) | 1585         | (20.9) | <0.0001  |
| Coexisting medical conditions |                 |        |              |        |          |
| Mental disorders              | 102874          | (15.1) | 2027         | (26.7) | <0.0001  |
| Hypertension                  | 135984          | (20.0) | 1604         | (21.2) | 0.0111   |
| Diabetes                      | 82560           | (12.1) | 1543         | (20.4) | <0.0001  |
| COPD                          | 55169           | (8.1)  | 876          | (11.6) | <0.0001  |
| Ischemic heart disease        | 47174           | (6.9)  | 650          | (8.6)  | <0.0001  |
| Stroke                        | 26507           | (3.9)  | 512          | (6.8)  | <0.0001  |
| Congestive heart failure      | 13287           | (2.0)  | 359          | (4.7)  | <0.0001  |
| Parkinson's disease           | 17991           | (2.6)  | 230          | (3.0)  | 0.0355   |
| Renal dialysis                | 7564            | (1.1)  | 230          | (3.0)  | <0.0001  |
| Hyperlipidemia                | 22779           | (3.4)  | 120          | (1.6)  | <0.0001  |
| Types of fracture             |                 |        |              |        |          |
| Fracture with surgery         | 482458          | (70.9) | 4040         | (53.3) | <0.0001  |
| Traumatic brain injury        | 119165          | (17.5) | 1263         | (16.7) | 0.0520   |
| Fracture of neck and trunk    | 97677           | (14.4) | 1500         | (19.8) | <0.0001  |
| Fracture of upper limb        | 256356          | (37.7) | 2285         | (30.1) | <0.0001  |
| Fracture of lower limb        | 322161          | (47.3) | 3807         | (50.2) | <0.0001  |
| Hip fracture                  | 172592          | (25.4) | 2551         | (33.6) | <0.0001  |
| Open fractures                | 49783           | (7.3)  | 432          | (5.7)  | <0.0001  |

COPD = chronic obstructive pulmonary disease.

**Table 4** Adverse events after fracture in patients with and without liver cirrhosis

|                                | No LC, %  | LC, %     | OR (95% CI)*     |
|--------------------------------|-----------|-----------|------------------|
| 30-day in-hospital mortality   | 1.2       | 2.2       | 1.61 (1.37-1.89) |
| Septicemia                     | 2.5       | 5.5       | 1.77 (1.60-1.96) |
| Acute renal failure            | 0.7       | 1.4       | 1.63 (1.33-1.99) |
| Medical expenditure, USD†      | 2212±2550 | 2500±2743 | 158 (105-211)    |
| Length of hospital stay, days† | 8.5±13.8  | 9.6±10.5  | 0.22 (0.08-0.52) |

CI = confidence interval; LC = liver cirrhosis; OR = odds ratio.

\*Controlled for all covariates listed in Table 3.

†t-test showed mean±SD,  $p < 0.0001$  in medical expenditure and length of hospital stay; beta coefficients and 95% CIs of medical expenditure and length of hospital stay associated with liver cirrhosis were calculated in multiple linear regression.

**Table 5** Liver cirrhosis associated with post-fracture adverse events in the stratification analysis by age, sex, and type of fracture

|                         | People without liver cirrhosis |         |           | People with liver cirrhosis |         |           | Risk of events*  |
|-------------------------|--------------------------------|---------|-----------|-----------------------------|---------|-----------|------------------|
|                         | n                              | Events* | Incidence | n                           | Events* | Incidence | OR (95% CI)†     |
| Female                  | 330440                         | 11082   | 3.4       | 2586                        | 219     | 8.5       | 2.00 (1.73-2.30) |
| Male                    | 350266                         | 15863   | 4.5       | 4998                        | 402     | 8.0       | 1.61 (1.45-1.80) |
| Age, 20-29 years        | 78164                          | 1862    | 2.4       | 82                          | 6       | 7.3       | 2.34 (1.00-5.52) |
| Age, 30-39 years        | 71008                          | 1698    | 2.4       | 718                         | 47      | 6.6       | 1.84 (1.35-2.51) |
| Age, 40-49 years        | 83951                          | 2215    | 2.6       | 1433                        | 118     | 8.2       | 2.29 (1.87-2.81) |
| Age, 50-59 years        | 110315                         | 3053    | 2.8       | 1400                        | 99      | 7.1       | 1.90 (1.53-2.36) |
| Age, 60-69 years        | 96376                          | 3362    | 3.5       | 1136                        | 92      | 8.1       | 1.99 (1.60-2.49) |
| Age, ≥70 years          | 240892                         | 14755   | 6.1       | 2815                        | 259     | 9.2       | 1.41 (1.24-1.61) |
| Fracture with surgery   | 482458                         | 12709   | 2.6       | 4040                        | 297     | 7.4       | 2.16 (1.91-2.44) |
| Traumatic brain injury  | 119165                         | 8617    | 7.2       | 1263                        | 157     | 12.4      | 1.60 (1.35-1.90) |
| Neck and trunk fracture | 97677                          | 4864    | 5.0       | 1500                        | 107     | 7.1       | 1.42 (1.16-1.73) |
| Upper limb fracture     | 256356                         | 4706    | 1.8       | 2285                        | 104     | 4.6       | 1.78 (1.45-2.18) |
| Lower limb fracture     | 322161                         | 14467   | 4.5       | 3807                        | 351     | 9.2       | 1.79 (1.60-2.00) |
| Hip fracture            | 172592                         | 10059   | 5.8       | 2551                        | 265     | 10.4      | 1.71 (1.23-2.37) |

CI = confidence interval; OR = odds ratio.

\*Any adverse events included 30-day in-hospital mortality, septicemia, and acute renal failure.

†Controlled for all covariates listed in Table 3.

**Table 6** Cirrhosis-related clinical indicators' effect on the outcomes of fracture admission in patients with liver cirrhosis

| Characteristics of cirrhosis<br>before fracture admission | 30-day in-hospital adverse events* |        |              |                  |
|-----------------------------------------------------------|------------------------------------|--------|--------------|------------------|
|                                                           | n                                  | events | incidence, % | OR (95% CI)†     |
| No LC                                                     | 680706                             | 26945  | 4.0          | 1.00 (reference) |
| Effects of liver admission                                |                                    |        |              |                  |
| LC without liver admission                                | 5068                               | 401    | 7.9          | 1.65 (1.49-1.84) |
| LC with liver admission                                   | 2516                               | 220    | 8.7          | 1.91 (1.65-2.20) |
| Effects of ADS                                            |                                    |        |              |                  |
| LC without ADS                                            | 6397                               | 530    | 8.3          | 1.70 (1.55-1.86) |
| LC with ADS                                               | 1187                               | 91     | 7.7          | 1.97 (1.58-2.45) |
| Effects of jaundice                                       |                                    |        |              |                  |
| LC without jaundice                                       | 7013                               | 554    | 7.9          | 1.64 (1.50-1.80) |
| LC with jaundice                                          | 571                                | 67     | 11.7         | 3.15 (2.42-4.10) |
| Effects of ascites                                        |                                    |        |              |                  |
| LC without ascites                                        | 6337                               | 479    | 7.6          | 1.59 (1.45-1.75) |
| LC with ascites                                           | 1247                               | 142    | 11.4         | 2.49 (2.08-2.98) |
| Effects of GI hemorrhage                                  |                                    |        |              |                  |
| LC without GI hemorrhage                                  | 5688                               | 439    | 7.7          | 1.62 (1.46-1.79) |
| LC with GI hemorrhage                                     | 1896                               | 182    | 9.6          | 2.09 (1.79-2.45) |
| Effects of hepatic coma                                   |                                    |        |              |                  |
| LC without hepatic coma                                   | 6587                               | 503    | 7.6          | 1.59 (1.45-1.75) |
| LC with hepatic coma                                      | 997                                | 118    | 11.8         | 2.77 (2.27-3.38) |
| Number of cirrhotic indicators‡                           |                                    |        |              |                  |
| 0                                                         | 3772                               | 254    | 6.7          | 1.36 (1.19-1.54) |
| 1                                                         | 2378                               | 206    | 8.7          | 1.83 (1.58-2.12) |
| 2                                                         | 944                                | 105    | 11.1         | 2.65 (2.15-3.27) |
| 3                                                         | 359                                | 43     | 12.0         | 2.95 (2.12-4.09) |
| ≥4                                                        | 131                                | 13     | 9.9          | 2.94 (1.64-5.29) |

ADS, alcohol dependence syndrome; CI, confidence interval; GI, gastrointestinal; LC, liver cirrhosis; OR, odds ratio.

\*Adverse events included with 30-day in-hospital mortality, septicemia, and acute renal failure.

†Controlled for all covariates listed in Table 3.

‡Liver-related illnesses include alcohol dependence syndrome, ascites, jaundice, gastrointestinal hemorrhage, and hepatic coma.

**STROBE 2007 (v4) checklist of items to be included in reports of observational studies in epidemiology\***  
**Checklist for cohort, case-control, and cross-sectional studies (combined)**

| Section/Topic             | Item # | Recommendation                                                                                                                                                                                                                                                                                                                                                                                                                                                         | Reported on page # |
|---------------------------|--------|------------------------------------------------------------------------------------------------------------------------------------------------------------------------------------------------------------------------------------------------------------------------------------------------------------------------------------------------------------------------------------------------------------------------------------------------------------------------|--------------------|
| Title and abstract        | 1      | (a) Indicate the study's design with a commonly used term in the title or the abstract                                                                                                                                                                                                                                                                                                                                                                                 | 1, 3               |
|                           |        | (b) Provide in the abstract an informative and balanced summary of what was done and what was found                                                                                                                                                                                                                                                                                                                                                                    | 3                  |
| <b>Introduction</b>       |        |                                                                                                                                                                                                                                                                                                                                                                                                                                                                        |                    |
| Background/rationale      | 2      | Explain the scientific background and rationale for the investigation being reported                                                                                                                                                                                                                                                                                                                                                                                   | 4                  |
| Objectives                | 3      | State specific objectives, including any pre-specified hypotheses                                                                                                                                                                                                                                                                                                                                                                                                      | 4, 5               |
| <b>Methods</b>            |        |                                                                                                                                                                                                                                                                                                                                                                                                                                                                        |                    |
| Study design              | 4      | Present key elements of study design early in the paper                                                                                                                                                                                                                                                                                                                                                                                                                | 6                  |
| Setting                   | 5      | Describe the setting, locations, and relevant dates, including periods of recruitment, exposure, follow-up, and data collection                                                                                                                                                                                                                                                                                                                                        | 6, 7               |
| Participants              | 6      | (a) <i>Cohort study</i> —Give the eligibility criteria, and the sources and methods of selection of participants. Describe methods of follow-up<br><i>Case-control study</i> —Give the eligibility criteria, and the sources and methods of case ascertainment and control selection. Give the rationale for the choice of cases and controls<br><i>Cross-sectional study</i> —Give the eligibility criteria, and the sources and methods of selection of participants | 6, 7               |
|                           |        | (b) <i>Cohort study</i> —For matched studies, give matching criteria and number of exposed and unexposed<br><i>Case-control study</i> —For matched studies, give matching criteria and the number of controls per case                                                                                                                                                                                                                                                 | 6, 7               |
| Variables                 | 7      | Clearly define all outcomes, exposures, predictors, potential confounders, and effect modifiers. Give diagnostic criteria, if applicable                                                                                                                                                                                                                                                                                                                               | 7, 8, 9            |
| Data sources/ measurement | 8*     | For each variable of interest, give sources of data and details of methods of assessment (measurement). Describe comparability of assessment methods if there is more than one group                                                                                                                                                                                                                                                                                   | 7, 8, 9            |
| Bias                      | 9      | Describe any efforts to address potential sources of bias                                                                                                                                                                                                                                                                                                                                                                                                              | 7, 8, 9            |
| Study size                | 10     | Explain how the study size was arrived at                                                                                                                                                                                                                                                                                                                                                                                                                              | 7, 8, 9            |
| Quantitative variables    | 11     | Explain how quantitative variables were handled in the analyses. If applicable, describe which groupings were chosen and why                                                                                                                                                                                                                                                                                                                                           | 7, 8, 9            |
| Statistical methods       | 12     | (a) Describe all statistical methods, including those used to control for confounding                                                                                                                                                                                                                                                                                                                                                                                  | 7, 8, 9            |
|                           |        | (b) Describe any methods used to examine subgroups and interactions                                                                                                                                                                                                                                                                                                                                                                                                    | 7, 8, 9            |
|                           |        | (c) Explain how missing data were addressed                                                                                                                                                                                                                                                                                                                                                                                                                            | 7, 8, 9            |
|                           |        | (d) <i>Cohort study</i> —If applicable, explain how loss to follow-up was addressed<br><i>Case-control study</i> —If applicable, explain how matching of cases and controls was addressed                                                                                                                                                                                                                                                                              | 7, 8, 9            |

|                          |     |                                                                                                                                                                                                              |            |
|--------------------------|-----|--------------------------------------------------------------------------------------------------------------------------------------------------------------------------------------------------------------|------------|
|                          |     | <i>Cross-sectional study</i> —If applicable, describe analytical methods taking account of sampling strategy                                                                                                 |            |
|                          |     | (e) Describe any sensitivity analyses                                                                                                                                                                        | 7, 8, 9    |
| <b>Results</b>           |     |                                                                                                                                                                                                              |            |
| Participants             | 13* | (a) Report numbers of individuals at each stage of study—eg numbers potentially eligible, examined for eligibility, confirmed eligible, included in the study, completing follow-up, and analysed            | 10, 11, 12 |
|                          |     | (b) Give reasons for non-participation at each stage                                                                                                                                                         | 10, 11, 12 |
|                          |     | (c) Consider use of a flow diagram                                                                                                                                                                           | 10, 11, 12 |
| Descriptive data         | 14* | (a) Give characteristics of study participants (eg demographic, clinical, social) and information on exposures and potential confounders                                                                     | 10, 11, 12 |
|                          |     | (b) Indicate number of participants with missing data for each variable of interest                                                                                                                          | 10, 11, 12 |
|                          |     | (c) <i>Cohort study</i> —Summarise follow-up time (eg, average and total amount)                                                                                                                             | 10, 11, 12 |
| Outcome data             | 15* | <i>Cohort study</i> —Report numbers of outcome events or summary measures over time                                                                                                                          | 10, 11, 12 |
|                          |     | <i>Case-control study</i> —Report numbers in each exposure category, or summary measures of exposure                                                                                                         | 10, 11, 12 |
|                          |     | <i>Cross-sectional study</i> —Report numbers of outcome events or summary measures                                                                                                                           | 10, 11, 12 |
| Main results             | 16  | (a) Give unadjusted estimates and, if applicable, confounder-adjusted estimates and their precision (eg, 95% confidence interval). Make clear which confounders were adjusted for and why they were included | 10, 11, 12 |
|                          |     | (b) Report category boundaries when continuous variables were categorized                                                                                                                                    | 10, 11, 12 |
|                          |     | (c) If relevant, consider translating estimates of relative risk into absolute risk for a meaningful time period                                                                                             | 10, 11, 12 |
| Other analyses           | 17  | Report other analyses done—eg analyses of subgroups and interactions, and sensitivity analyses                                                                                                               | 10, 11, 12 |
| <b>Discussion</b>        |     |                                                                                                                                                                                                              |            |
| Key results              | 18  | Summarise key results with reference to study objectives                                                                                                                                                     | 13         |
| Limitations              | 19  | Discuss limitations of the study, taking into account sources of potential bias or imprecision. Discuss both direction and magnitude of any potential bias                                                   | 16         |
| Interpretation           | 20  | Give a cautious overall interpretation of results considering objectives, limitations, multiplicity of analyses, results from similar studies, and other relevant evidence                                   | 13-16      |
| Generalisability         | 21  | Discuss the generalisability (external validity) of the study results                                                                                                                                        | 13-16      |
| <b>Other information</b> |     |                                                                                                                                                                                                              |            |
| Funding                  | 22  | Give the source of funding and the role of the funders for the present study and, if applicable, for the original study on which the present article is based                                                | 23         |

\*Give information separately for cases and controls in case-control studies and, if applicable, for exposed and unexposed groups in cohort and cross-sectional studies.

**Note:** An Explanation and Elaboration article discusses each checklist item and gives methodological background and published examples of transparent reporting. The STROBE checklist is best used in conjunction with this article (freely available on the Web sites of PLoS Medicine at <http://www.plosmedicine.org/>, Annals of Internal Medicine at <http://www.annals.org/>, and Epidemiology at <http://www.epidem.com/>). Information on the STROBE Initiative is available at [www.strobe-statement.org](http://www.strobe-statement.org).
